# Supplementary material for: Synthesis of multi-donor dyes and influence of molecular design on dye-sensitized solar cells
Source: Royal Society of Chemistry journal article supplement (doi:10.1039/c6ra08530j), 2016-01-01

**Supporting information**

**Synthesis of Multi-donor Dyes and Influence of Molecular Design on Dye-sensitized Solar Cells**

Ashok Keerthi,<sup>a,b</sup> Ming Hui Chua,<sup>a</sup> Thuang Yuan Timothy Chan,<sup>a</sup> Yeru Liu,<sup>b,c</sup> Deepa Sriramulu,<sup>a</sup> Qing Wang,<sup>b,c</sup> Suresh Valiyaveetil\*<sup>a,b</sup>

<sup>a</sup> *Department of Chemistry, National University of Singapore, 3 Science Drive 3, Singapore 117543.*

<sup>b</sup> *NanoCore-NUSNNI, T-Lab Building, National University of Singapore, 5A Engineering Drive 1, Singapore 117411.*

<sup>c</sup> *Department of Materials Science and Engineering, Faculty of Engineering, National University of Singapore, Singapore 117574.*

\*Contact e-mail: [chmsv@nus.edu.sg](mailto:chmsv@nus.edu.sg)

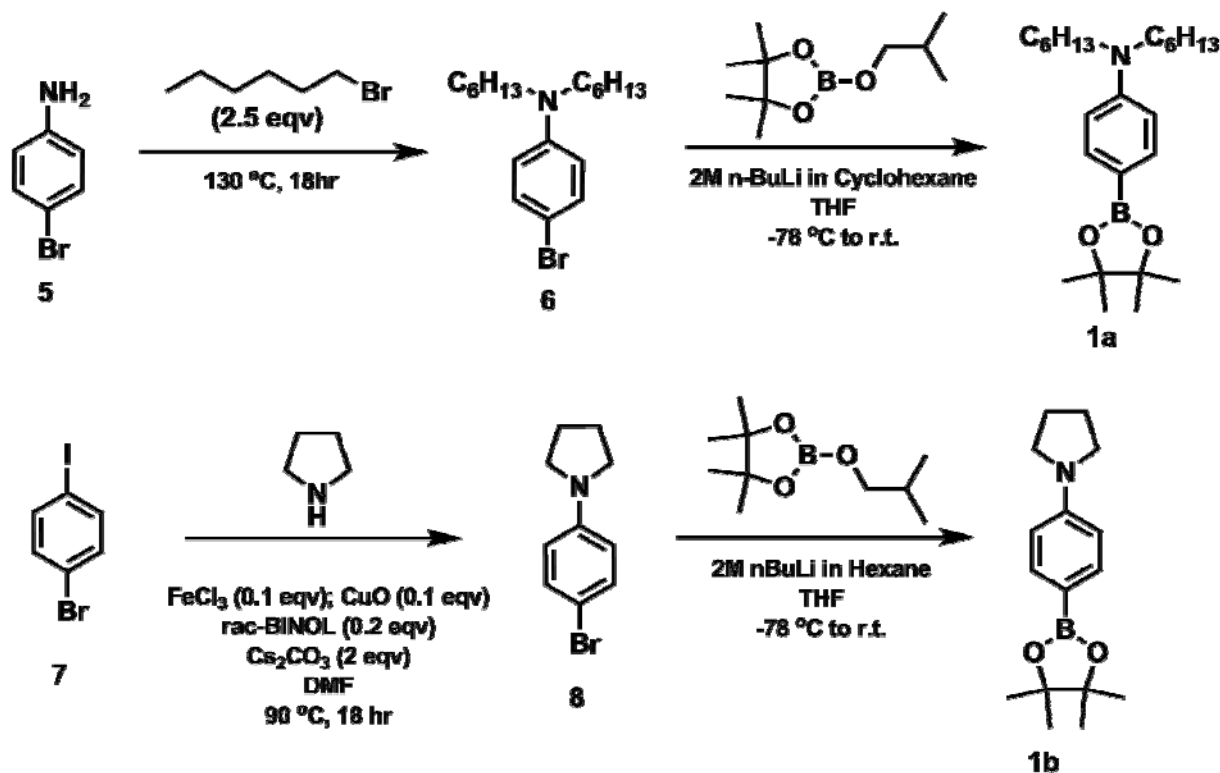

Scheme S1: Synthesis of intermediate compounds **1a** and **1b**.

#### Synthesis of 4-bromo-N,N-dihexylaniline (**6**)

4-Bromoaniline (5 g, 29 mmol) and 1-bromohexane (10.2 mL, 73 mmol) were heated to 130 °C and stirred for 18 hours. The reaction mixture was cooled to room temperature and 2M NaOH (50 mL) was added. The aqueous layer was extracted with diethyl ether (2 x 100 mL), the combined organic layers were dried with anhydrous Na<sub>2</sub>SO<sub>4</sub> and filtered. The solvent was removed under reduced pressure to obtain a black crude product, which was purified using column chromatography on silica gel with hexane as eluent to isolate pale yellow oil (3.62 g, yield 36.7%). MS (EI) *m/z* = 339.3 (M<sup>+</sup>), 340.3 (calcd.). <sup>1</sup>H NMR (300 MHz, CDCl<sub>3</sub>, ppm) δ = 7.26 – 7.29 (d, 2H), 6.51 – 6.54 (d, 2H), 3.22 – 3.27 (t, 4H), 1.56 – 1.58 (broad, 4H), 1.34 (s, 12H), 0.94 (s, 6H). Elem. Anal. Calcd. for C<sub>18</sub>H<sub>30</sub>BrN: C, 63.52%; H, 8.88%; Br, 23.48, N, 4.12%; found: C, 63.14%; H, 8.58%; Br, 23.70, N, 4.19%.

#### Synthesis of 4-dihexylamino-phenylboronic acid pinacol ester (**1a**)

Compound **6** (3.80 g, 11.18 mmol) was dissolved in anhydrous THF (50 mL) under nitrogen atmosphere and cooled to -78 °C in dry ice / acetone bath. n-BuLi in cyclohexane (15 mL, 30 mmol) was added drop wise and stirred at -78 °C for 1 hr. To this mixture, 2-isopropoxy-4,4,5,5-tetramethyl-1,3,2-dioxaborolane (5 mL, 22.8 mmol) was added slowly, stirred and gradually

warmed to room temperature. The mixture was added to ice water (50 mL, 0 °C), extracted with diethyl ether (2 x 50 mL), dried over anhydrous Na<sub>2</sub>SO<sub>4</sub> and filtered. The organic solvent was removed under reduced pressure to obtain brown oil. The crude product was purified over silica gel column using dichloromethane (DCM)/hexane (1:4) mixture as eluent to yield orange oil (2.72 g, 63 %). MS (EI) *m/z* = 387.4 (M<sup>+</sup>), 387.4 (calcd.). <sup>1</sup>H NMR (300 MHz, CDCl<sub>3</sub>, ppm): δ = 7.66 – 7.69 (d, 4H), 6.61 – 6.64 (d, 4H), 3.27 – 3.32 (t, 4H), 1.60 (quintet, 4H), 1.33 (s, 24H), 0.91 – 0.94 (t, 6H, –CH<sub>3</sub>). Elem. Anal. Calcd. for C<sub>24</sub>H<sub>42</sub>BNO<sub>2</sub>: C, 74.41%; H, 10.93%; N, 3.62%; found: C, 74.26%; H, 10.65%; N, 3.79%.

### Synthesis of 4-pyrrolidino-1-bromobenzene (8)

1-Bromo-4-iodobenzene (5 g, 17.75 mmol), iron(III) chloride (0.29 g, 1.79 mmol), copper(II) oxide (0.14 g, 1.76 mmol), rac-BINOL (1.02 g, 3.56 mmol) and cesium carbonate (12 g, 36.83 mmol) were taken into 250 mL round bottom flask, connected to vacuum for removing the air and backfilled with nitrogen gas. A solution of pyrrolidine (1.75 mL, 21.32 mmol) in DMF (35 mL) was added and the reaction mixture was stirred at 90 °C for 18 hours. After cooling to room temperature, the mixture was diluted with DCM (100 mL) and filtered to remove insoluble solids. The insoluble residue was rinsed with DCM, filtrate was washed with 1M NaOH (200 mL) followed by water (100 mL), combined organic layer was dried over anhydrous Na<sub>2</sub>SO<sub>4</sub>, filtered, concentrated under reduced pressure and the crude product was purified using column chromatography with DCM : Hexane (1:10) mixture as eluent to get a white solid (3.41 g, yield 85%). MS (EI) *m/z* = 224.1 (M<sup>+</sup>), 226.1 (calcd.). <sup>1</sup>H NMR (300 MHz, CDCl<sub>3</sub>, ppm): δ = 7.26 – 7.30 (d, 2H), 6.44 – 6.47 (d, 2H), 3.23 – 3.27 (t, 4H), 1.99 – 2.03 (quintet, 4H). <sup>13</sup>C NMR (δ, 75.4 MHz, CDCl<sub>3</sub>) ppm: δ = 146.69, 131.66, 113.27, 47.77, 25.43. Elem. Anal. Calcd. for C<sub>10</sub>H<sub>12</sub>BrN: C, 53.12%; H, 5.35%; Br, 35.34, N, 6.19%; found: C, 53.24%; H, 5.33%; Br, 35.80, N, 6.27%.

### Synthesis of 4-pyrrolidino-phenylboronic acid pinacol ester (1b)

Compound **8** (3.41 g, 15.1 mmol) dissolved in anhydrous THF (80 mL) was cooled to -78 °C under nitrogen atmosphere. To this, 2M n-BuLi in cyclohexane (16 mL, 32 mmol) was added slowly and stirred at -78 °C for 1 hr. 2-Isopropoxy-4,4,5,5-tetramethyl-1,3,2-dioxaborolane (6.2 mL, 30.4 mmol) was added slowly to the mixture, stirred and allowed to warm up to room temperature. The reaction mixture was added to ice water (50 mL), extracted with diethyl ether (3 x 50 mL), combined organic extracts were dried on anhydrous Na<sub>2</sub>SO<sub>4</sub>, filtered and the excess solvent was removed under reduced pressure to obtain a dark brown oil. The crude product was dissolved in minimum amount of diethyl ether, cooled to 0 °C for crystallization of the compound as pale pink crystals and collected by filtration (2.95 g, yield 71%). MS (EI) *m/z* = 273.2 (M<sup>+</sup>), 273.2 (calcd.). <sup>1</sup>H NMR (300 MHz, CDCl<sub>3</sub>, ppm): δ = 7.66 – 7.69 (d, 2H), 6.54 – 6.57 (d, 2H), 3.30 – 3.34 (t, 4H), 1.98 – 2.03 (quintet, 4H), 1.32 (s, 12H). Elem. Anal. Calcd. for C<sub>16</sub>H<sub>24</sub>BNO<sub>2</sub>: C, 70.35%; H, 8.86%; N, 5.13%; found: C, 70.47%; H, 9.01%; N, 5.21%.

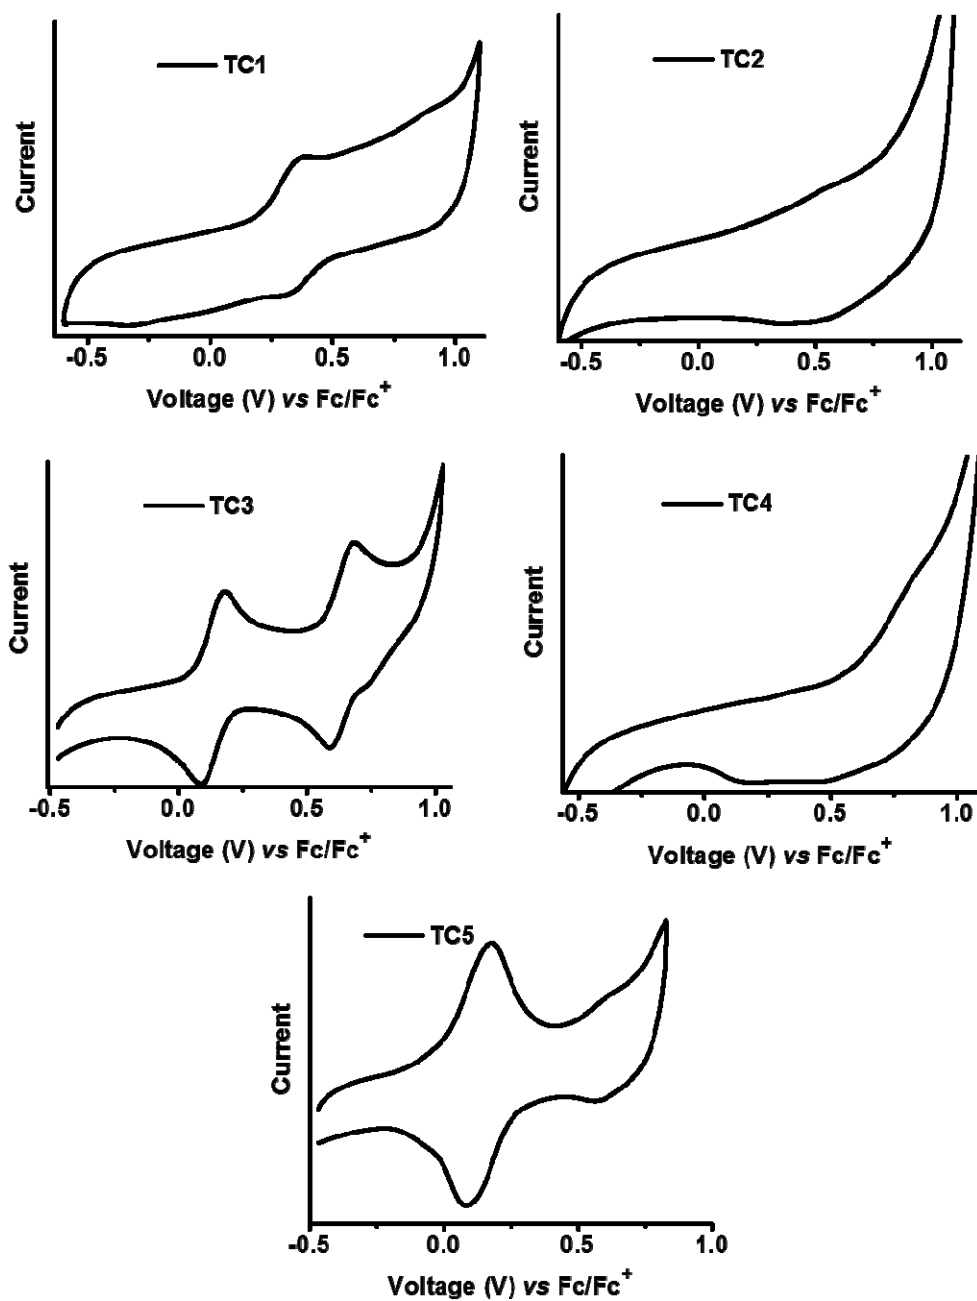

Figure S1. Enlarged cyclic voltammetry scans of dyes **TC1** – **TC5** at a scan rate of 100 mV/s in THF solution. Potentials reported with respect to ferrocene.

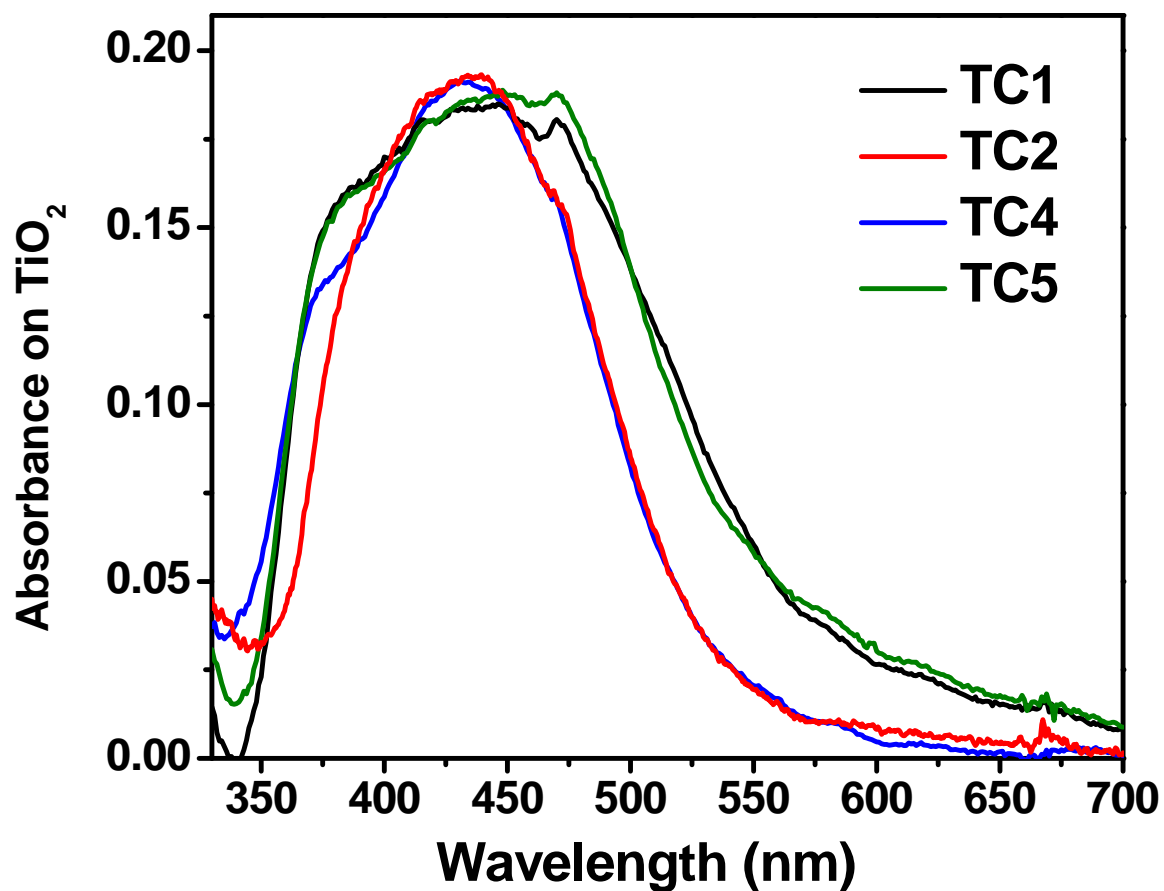

Figure S2. UV-vis absorption spectra of dyes (TC1, TC2, TC4 and TC5) on TiO<sub>2</sub> coated quartz plates. The plates were immersed in 0.25 mM dye solutions in THF for 24 hours and rinsed several times using fresh THF solvent.

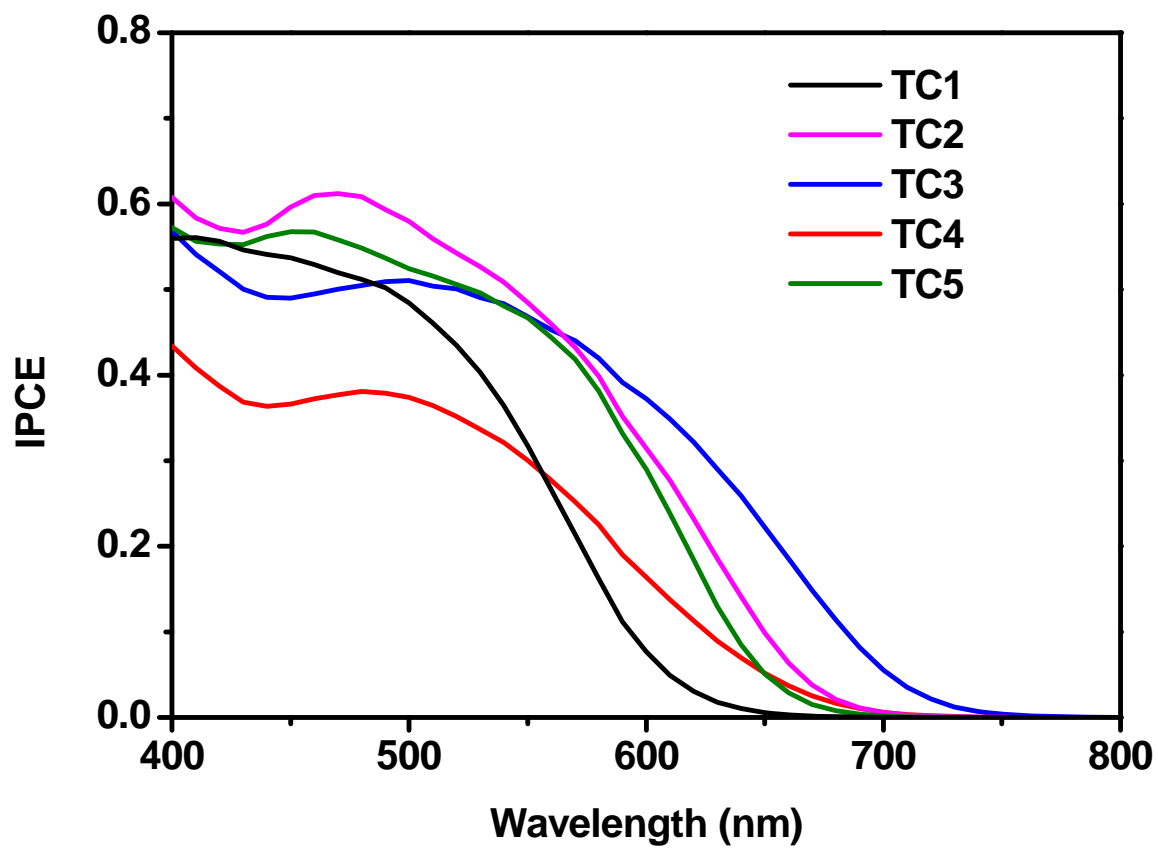

Figure S3. IPCE (Incident photon-to-current efficiency) curves of TC1 - TC5 dyes. The electrodes were immersed into a 0.25 mM solution of sensitizer in THF solution.

# 1H NMR and MS spectra of compound 1a

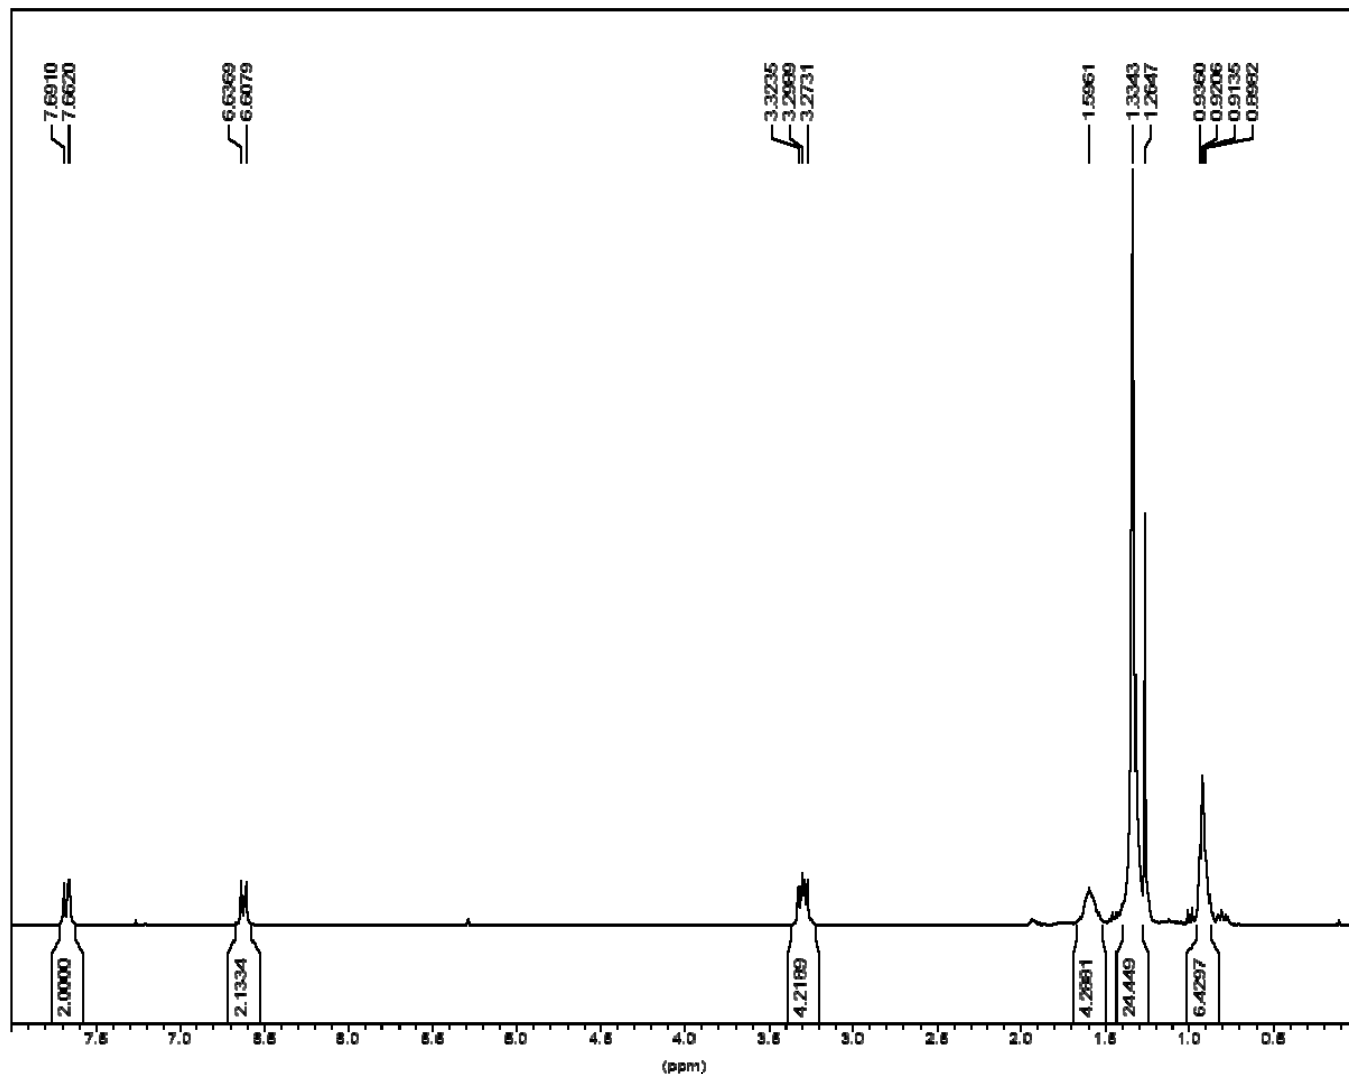

\*\*\* Current Data Parameters \*\*\*  
 NAME : fe08cmh  
 EXPNO : 4  
 PROCNO : 1  
 \*\*\* Acquisition Parameters \*\*\*  
 BF1 : 300.1300000 MHz  
 LOGNUC : 2H  
 NS : 15  
 O1 : 1853.43 Hz  
 PULPROG : zg30  
 SFO1 : 300.1318534 MHz  
 SOLVENT : CDCl3  
 SW : 17.9519 ppm  
 \*\*\* Processing Parameters \*\*\*  
 LB : 0.30 Hz  
 PHC0 : 223.183 degree  
 PHC1 : -0.157 degree

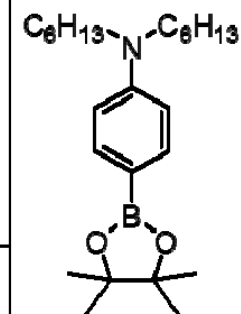

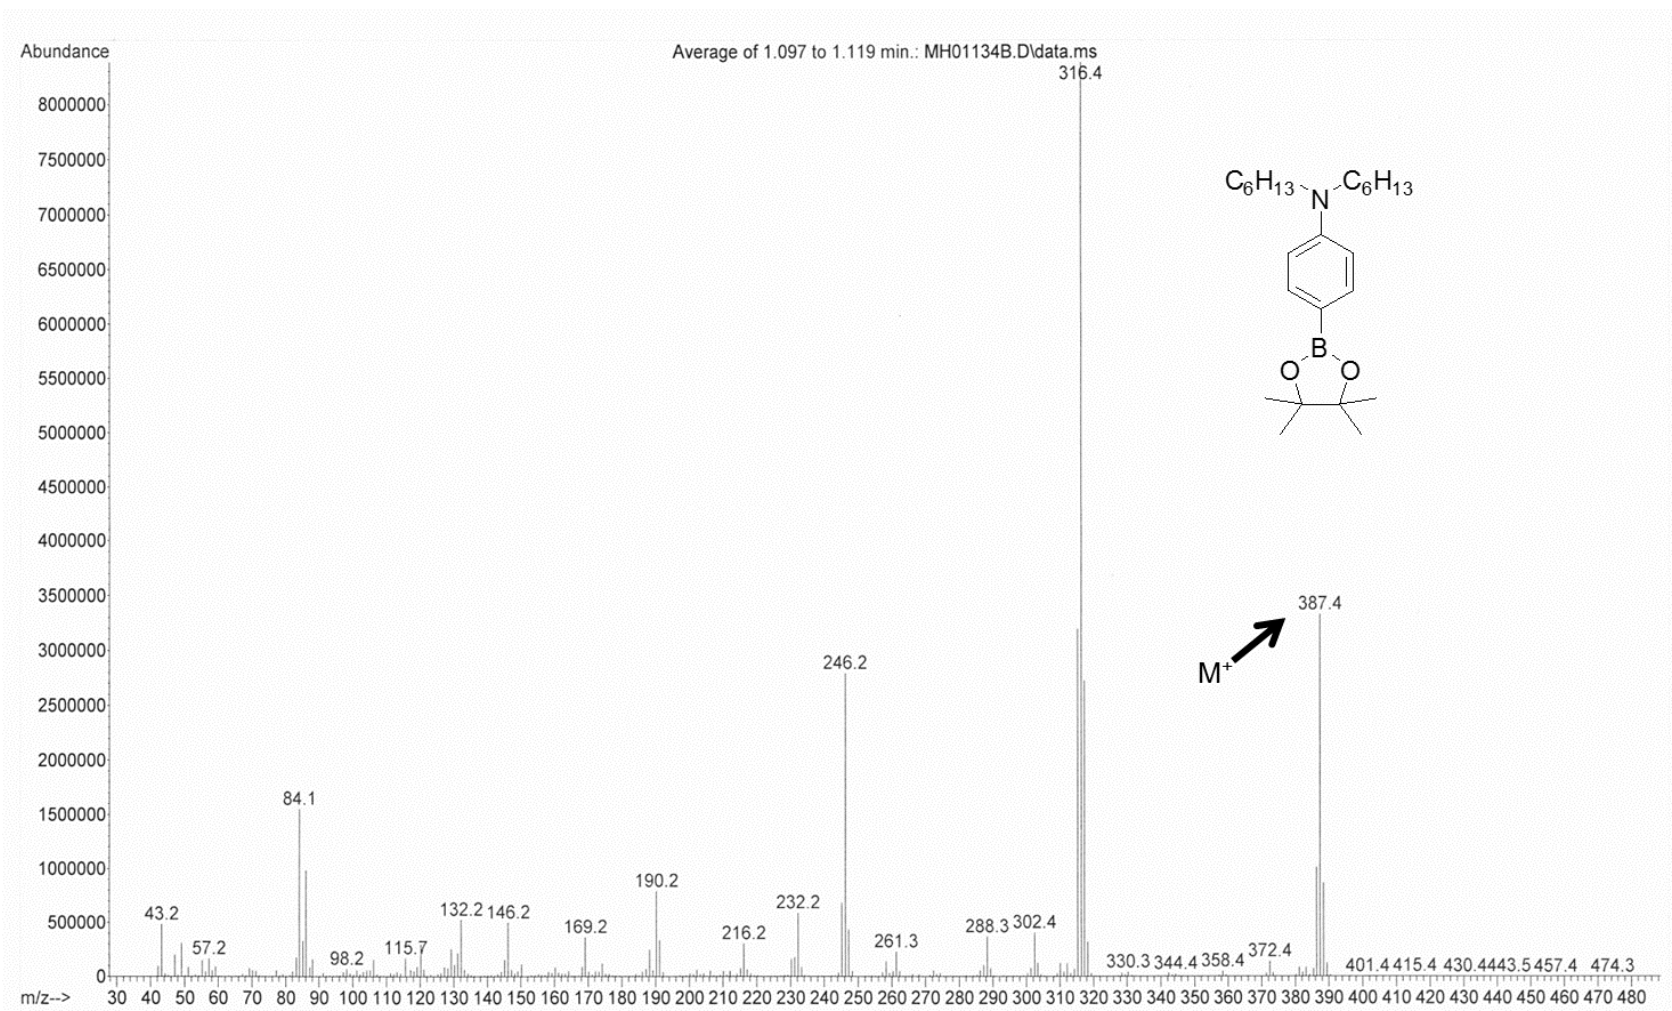



# 1H NMR and MS spectra of compound 1b

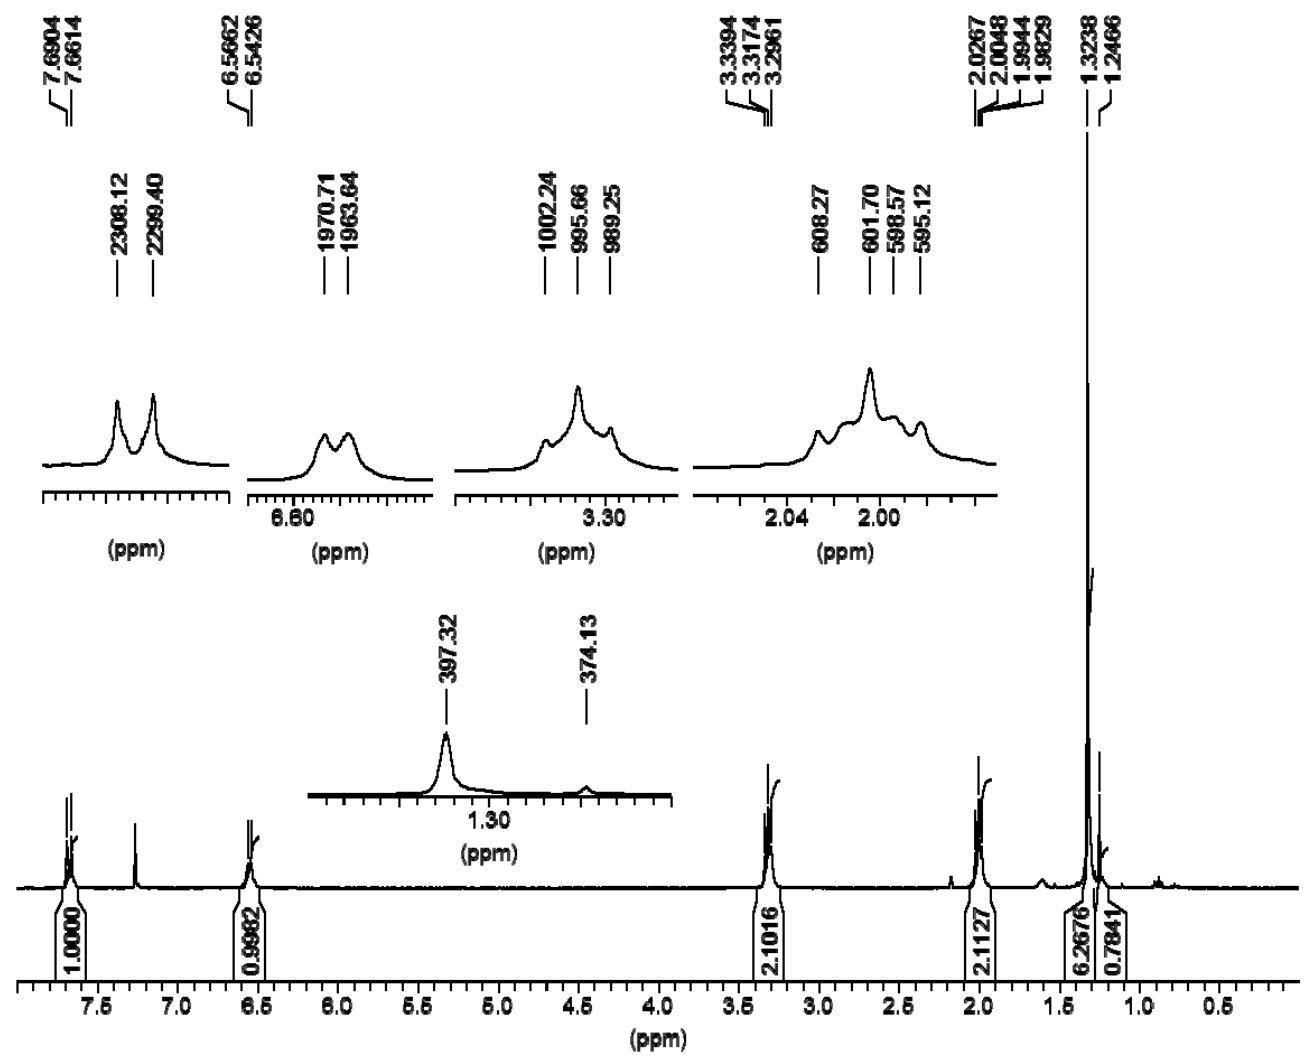

\*\*\* Current Data Parameters \*\*\*  
 NAME : se18cmh  
 EXPNO : 2  
 PROCNO : 1  
 \*\*\* Acquisition Parameters \*\*\*  
 INSTRUM : spect  
 LOCNUC : 2H  
 NS : 8  
 NUCLEUS : off  
 O1 : 1853.43 Hz  
 PULPROG : zg30  
 SFO1 : 300.1318534 MHz  
 SOLVENT : CDCl3  
 SW : 17.9519 ppm  
 TD : 32768  
 TE : 298.1 K  
 \*\*\* Processing Parameters \*\*\*  
 LB : 0.30 Hz  
 \*\*\* 1D NMR Plot Parameters \*\*\*  
 NUCLEUS : off

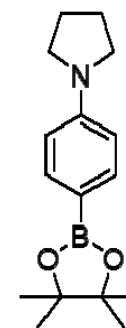

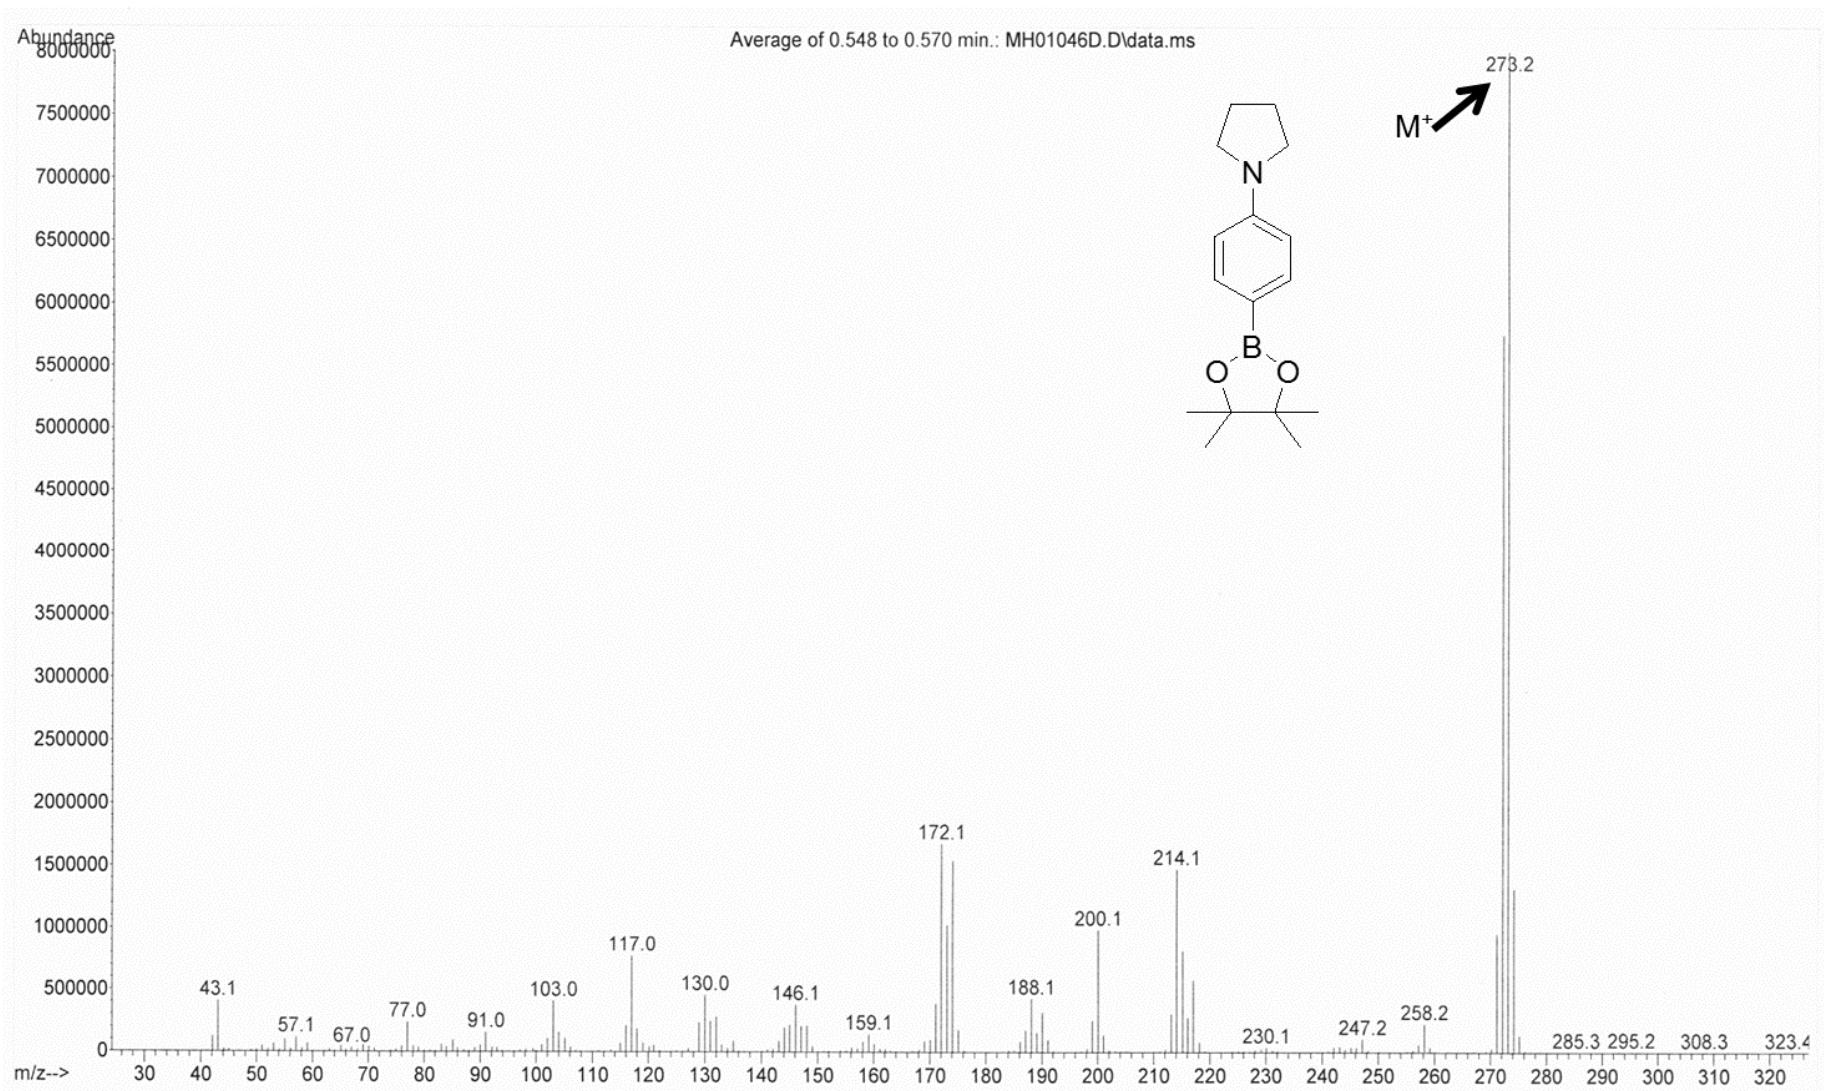

# 1H & 13C NMR of compound 2a

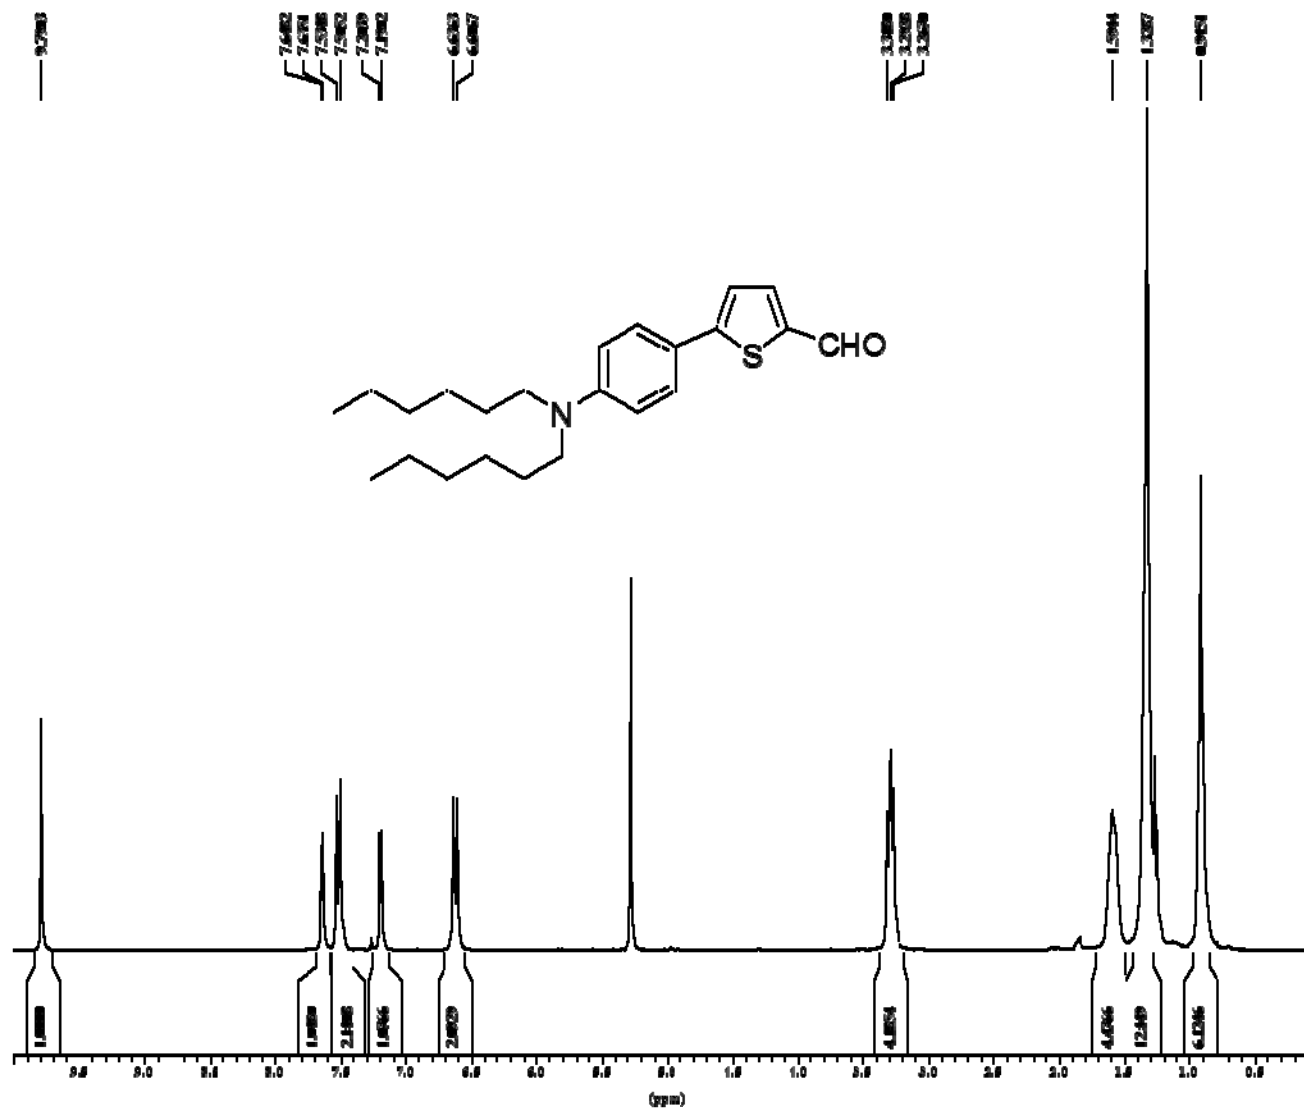

### \*\*\* Current Data Parameters \*\*\*

NAME : fe22cmh  
 EXPNO : 3  
 PROCNO : 1  
 \*\*\* Acquisition Parameters \*\*\*  
 LOCNUC : 2H  
 NS : 8  
 NUCLEUS : off  
 Q1 : 1853.43 Hz  
 PULPROG : zg30  
 SF01 : 300.1318534 MHz  
 SOLVENT : CDCl3  
 SW : 17.9519 ppm  
 ID : 32768  
 TE : 296.7 K  
 \*\*\* Processing Parameters \*\*\*  
 LB : 0.30 Hz  
 SF : 300.1300126 MHz  
 \*\*\* 1D NMR Plot Parameters \*\*\*  
 NUCLEUS : off

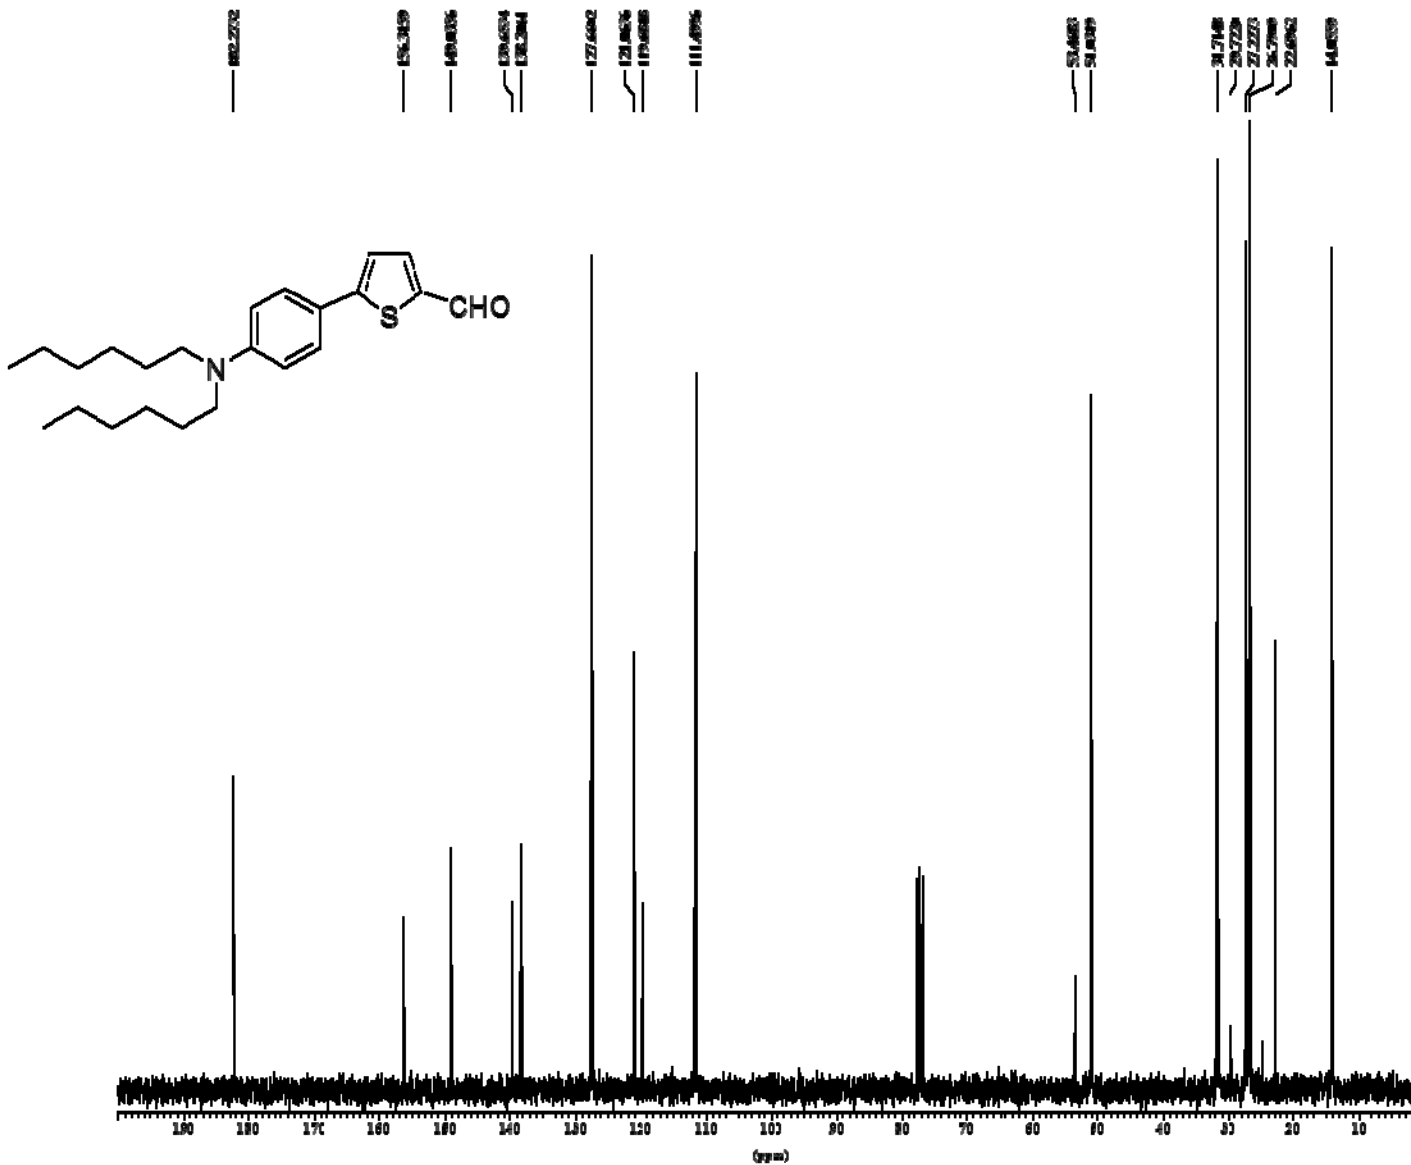

\*\*\* Current Data Parameters \*\*\*  
 NAME : fe22cmh  
 EXPNO : 4  
 PROCNO : 1  
 \*\*\* Acquisition Parameters \*\*\*  
 LOCUTC : 2H  
 NS : 101  
 NUCLEUS : off  
 O1 : 7924.11 Hz  
 PULPROG : zgpg30  
 SFO1 : 75.4756731 MHz  
 SOLVENT : CDCl3  
 SW : 238.2968 ppm  
 ID : 32768  
 TE : 296.7 K  
 \*\*\* Processing Parameters \*\*\*  
 LB : 1.00 Hz  
 SF : 75.4677819 MHz  
 \*\*\* 1D NMR Plot Parameters \*\*\*  
 NUCLEUS : off

## MS spectra of compound 2a

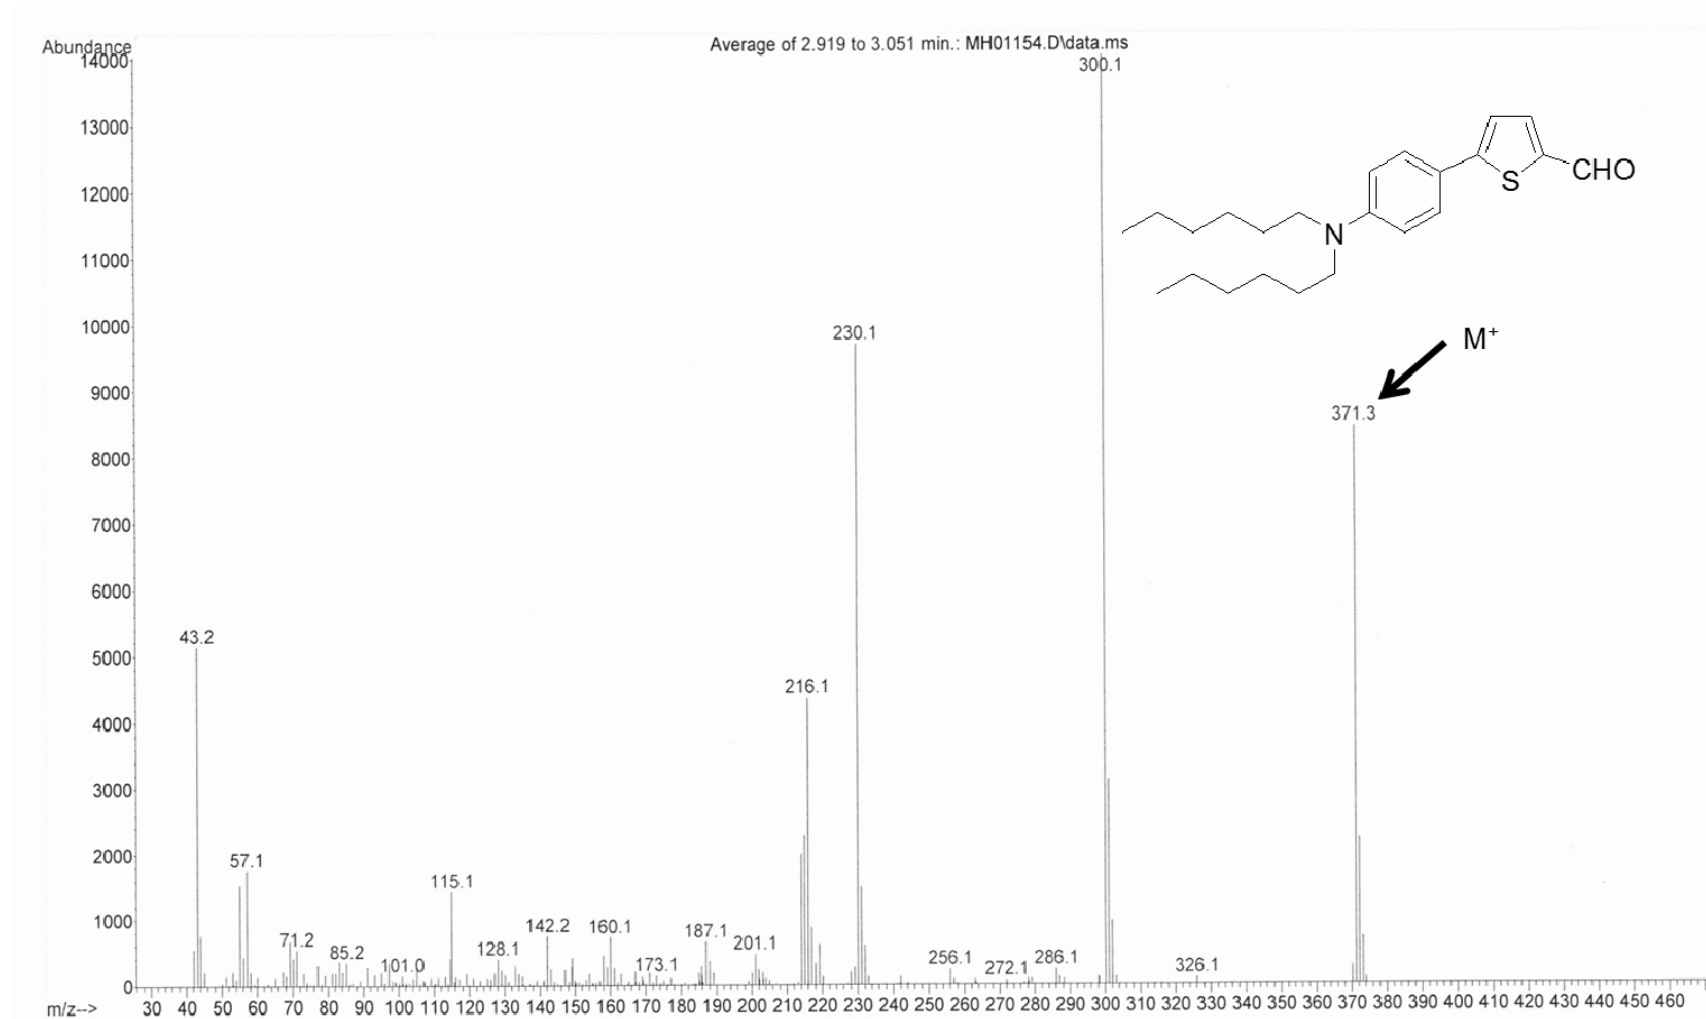

# 1H & 13C NMR of compound TC1

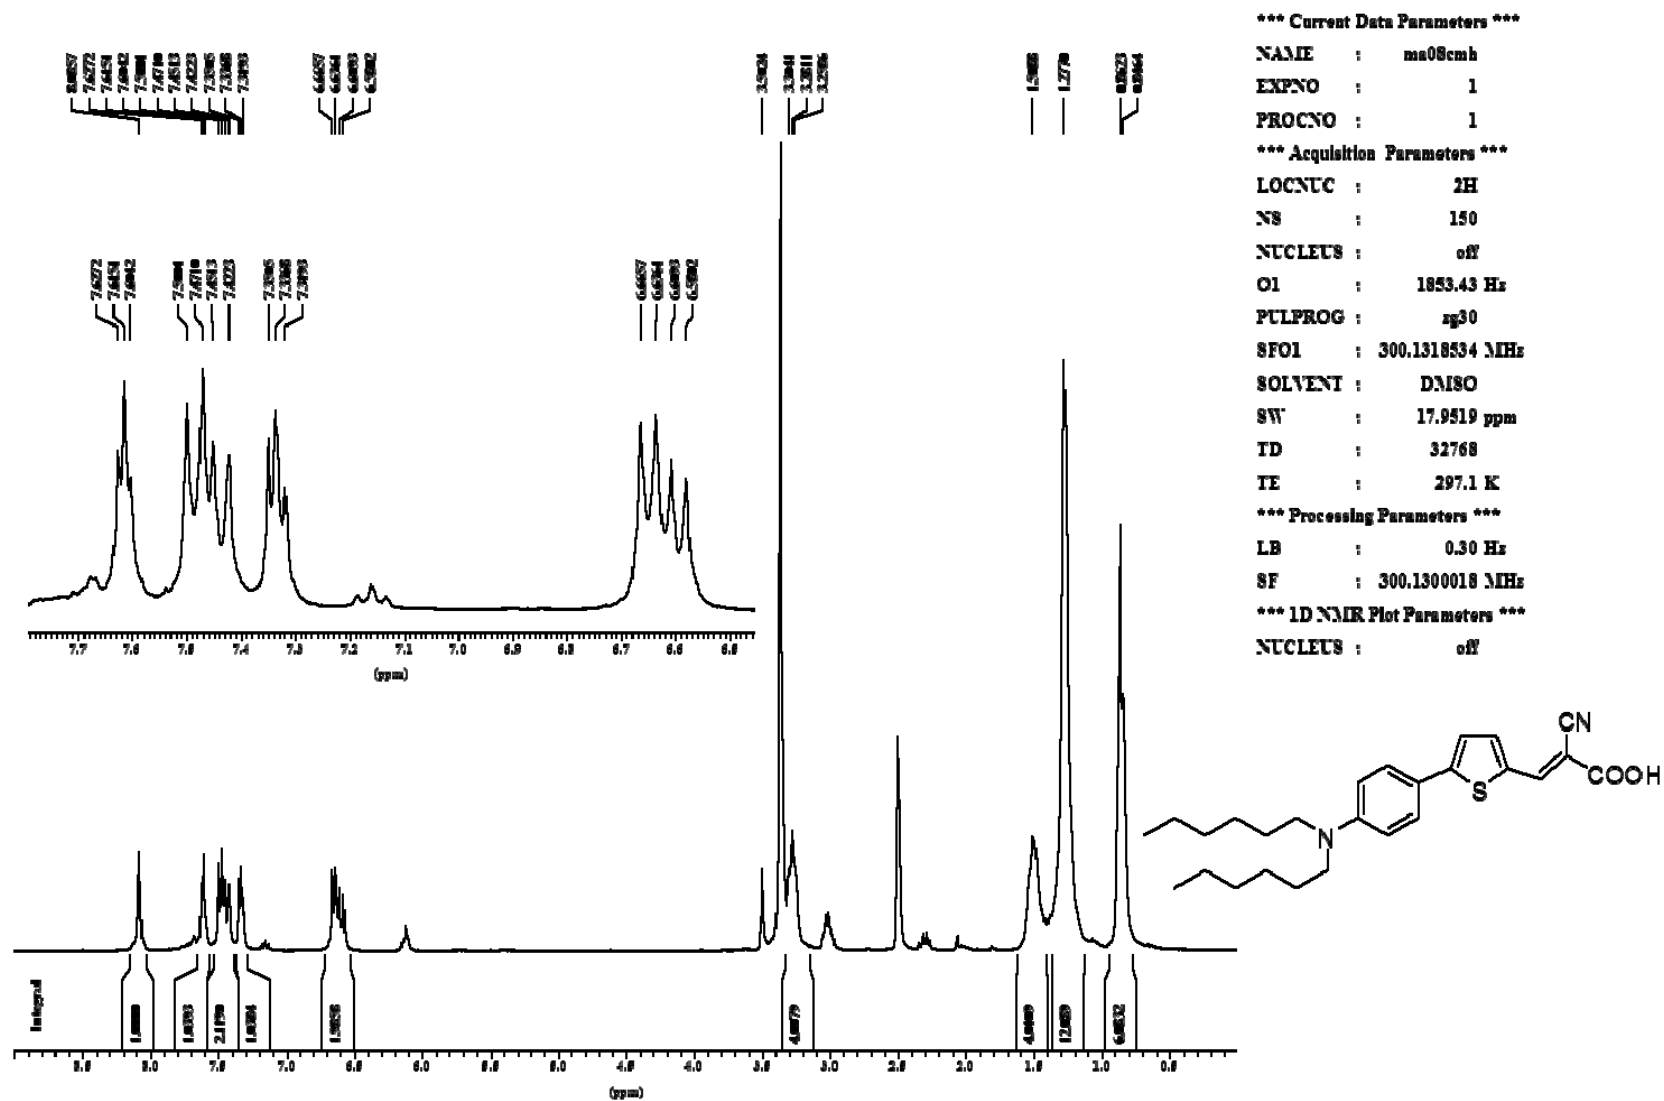

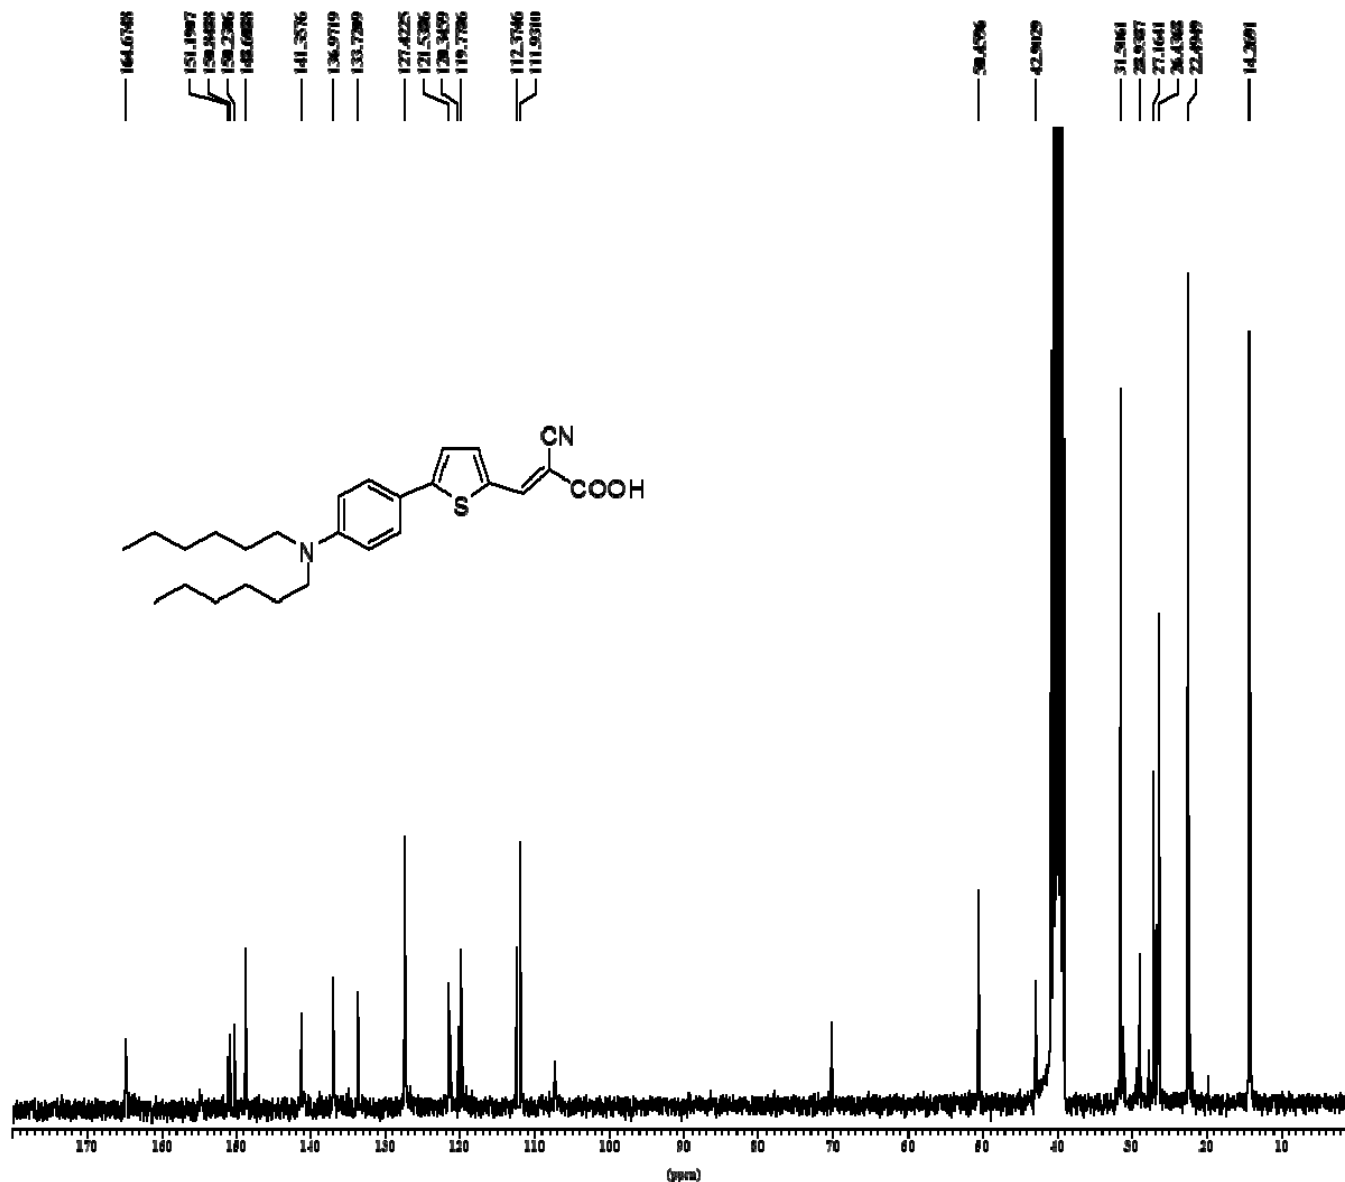

\*\*\* Current Data Parameters \*\*\*

NAME : mr08ak  
 EXPNO : 8  
 PROCNO : 1

\*\*\* Acquisition Parameters \*\*\*

LOCNUC : 2H  
 NS : 23295  
 NUCLEUS : off  
 O1 : 7924.11 Hz  
 PULPROG : zgpg30  
 SFO1 : 75.4756731 MHz  
 SOLVENT : DMSO  
 SW : 238.2968 ppm  
 ID : 32768  
 IE : 298.3 K

\*\*\* Processing Parameters \*\*\*

LB : 1.00 Hz  
 SF : 75.4677567 MHz

\*\*\* 1D NMR Plot Parameters \*\*\*

NUCLEUS : off

## FT-IR & MALDI-TOF of compound TC1

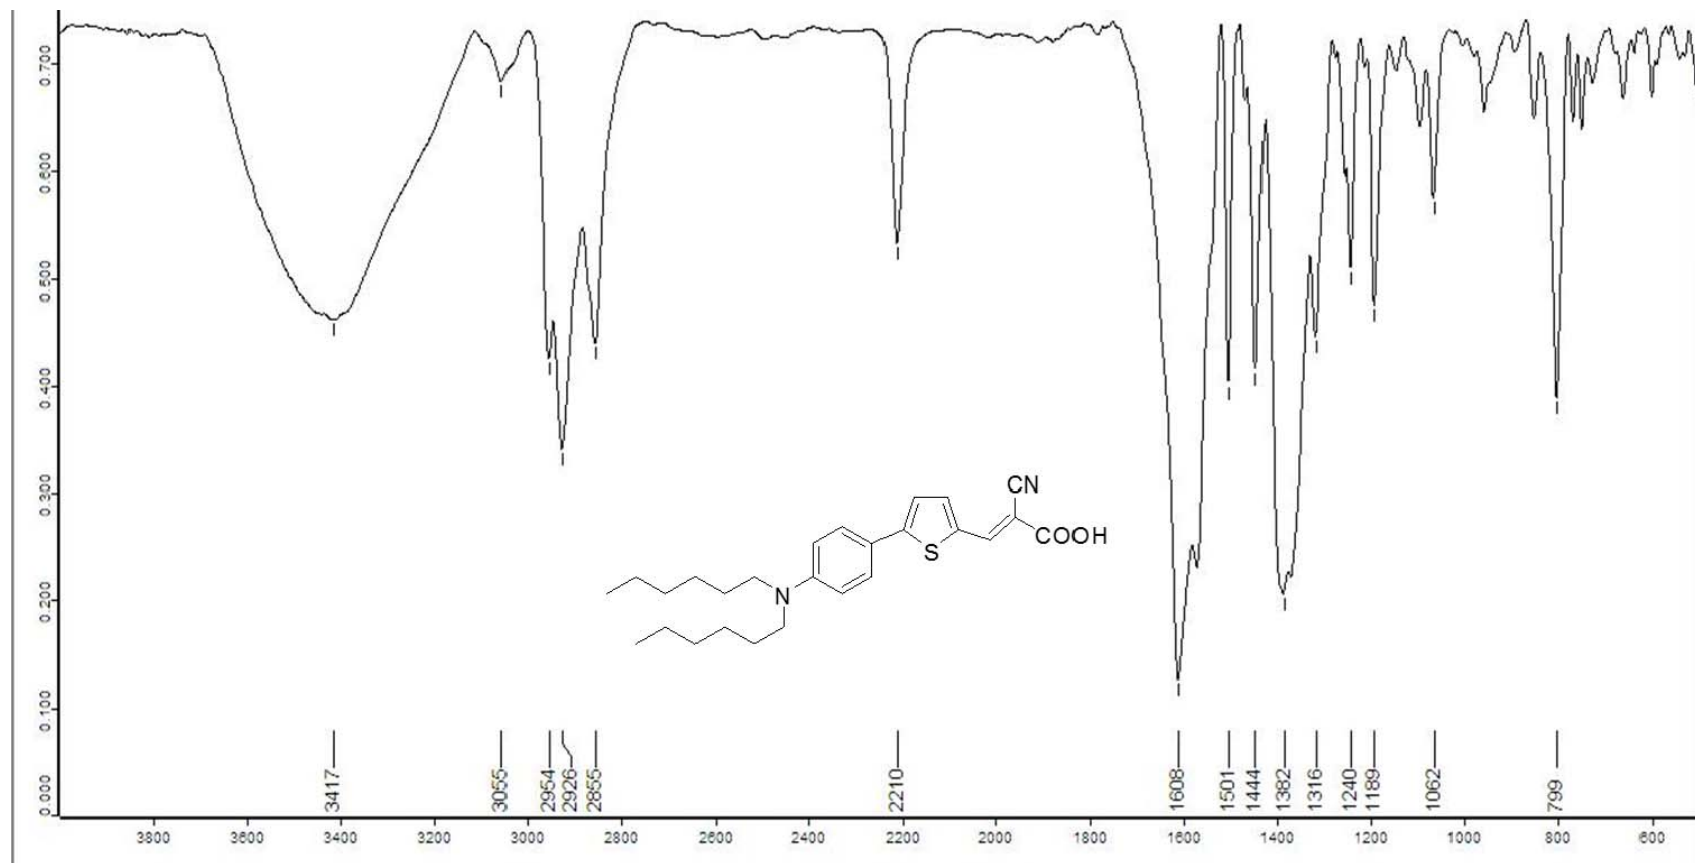



Comment 1

Comment 2

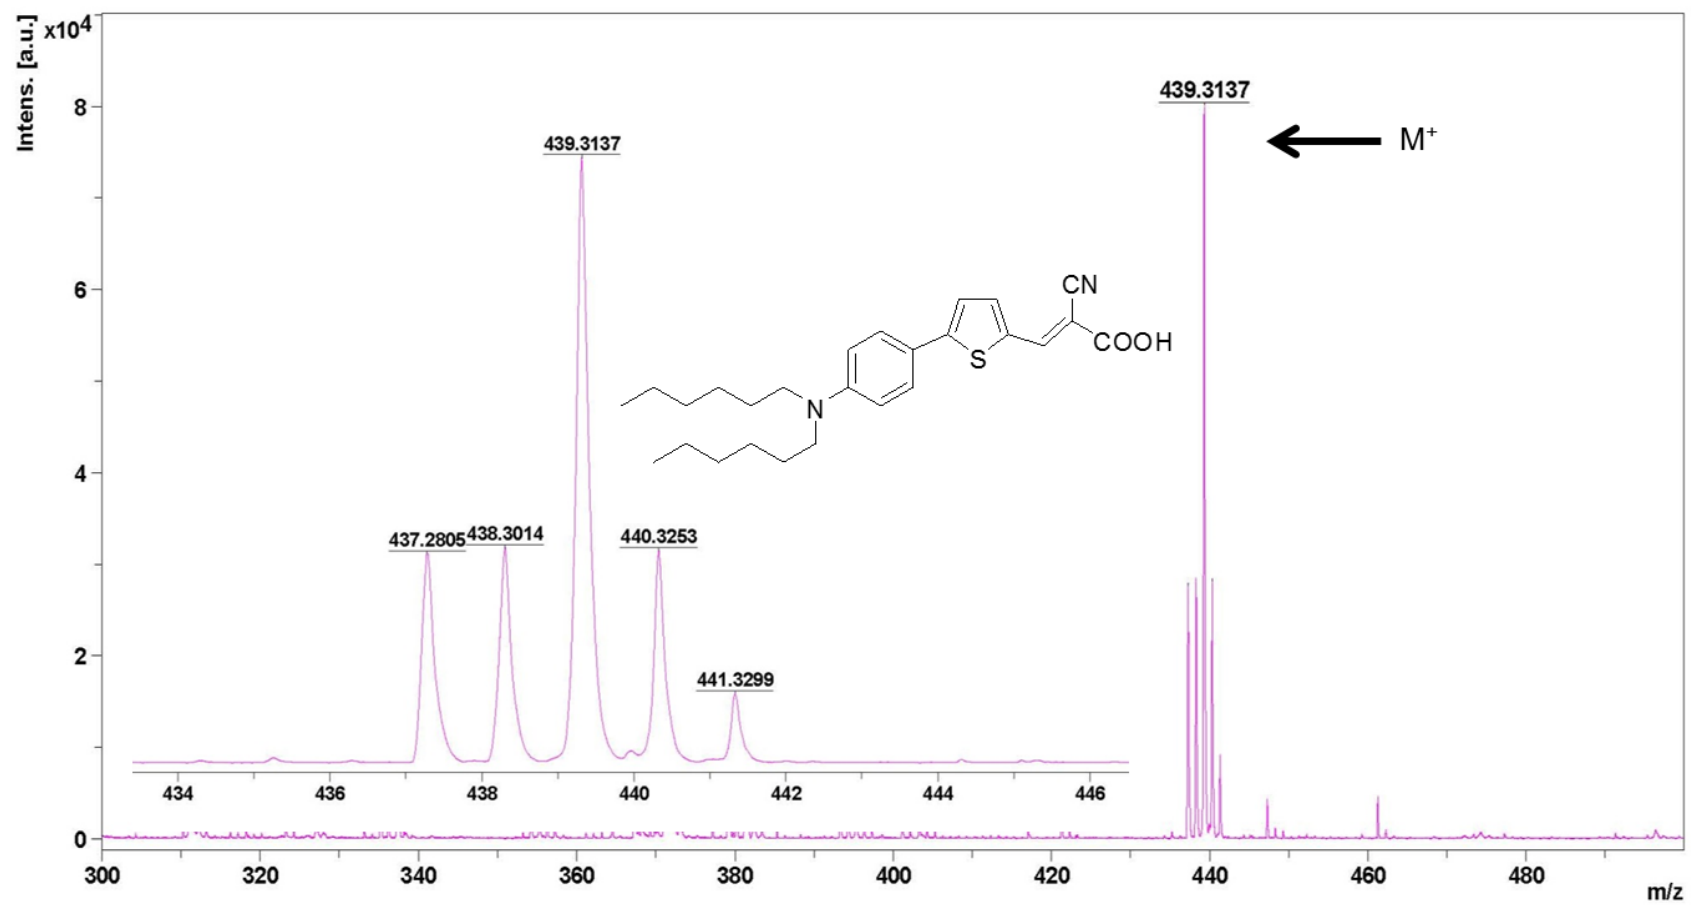

# 1H & 13C NMR of compound 2b

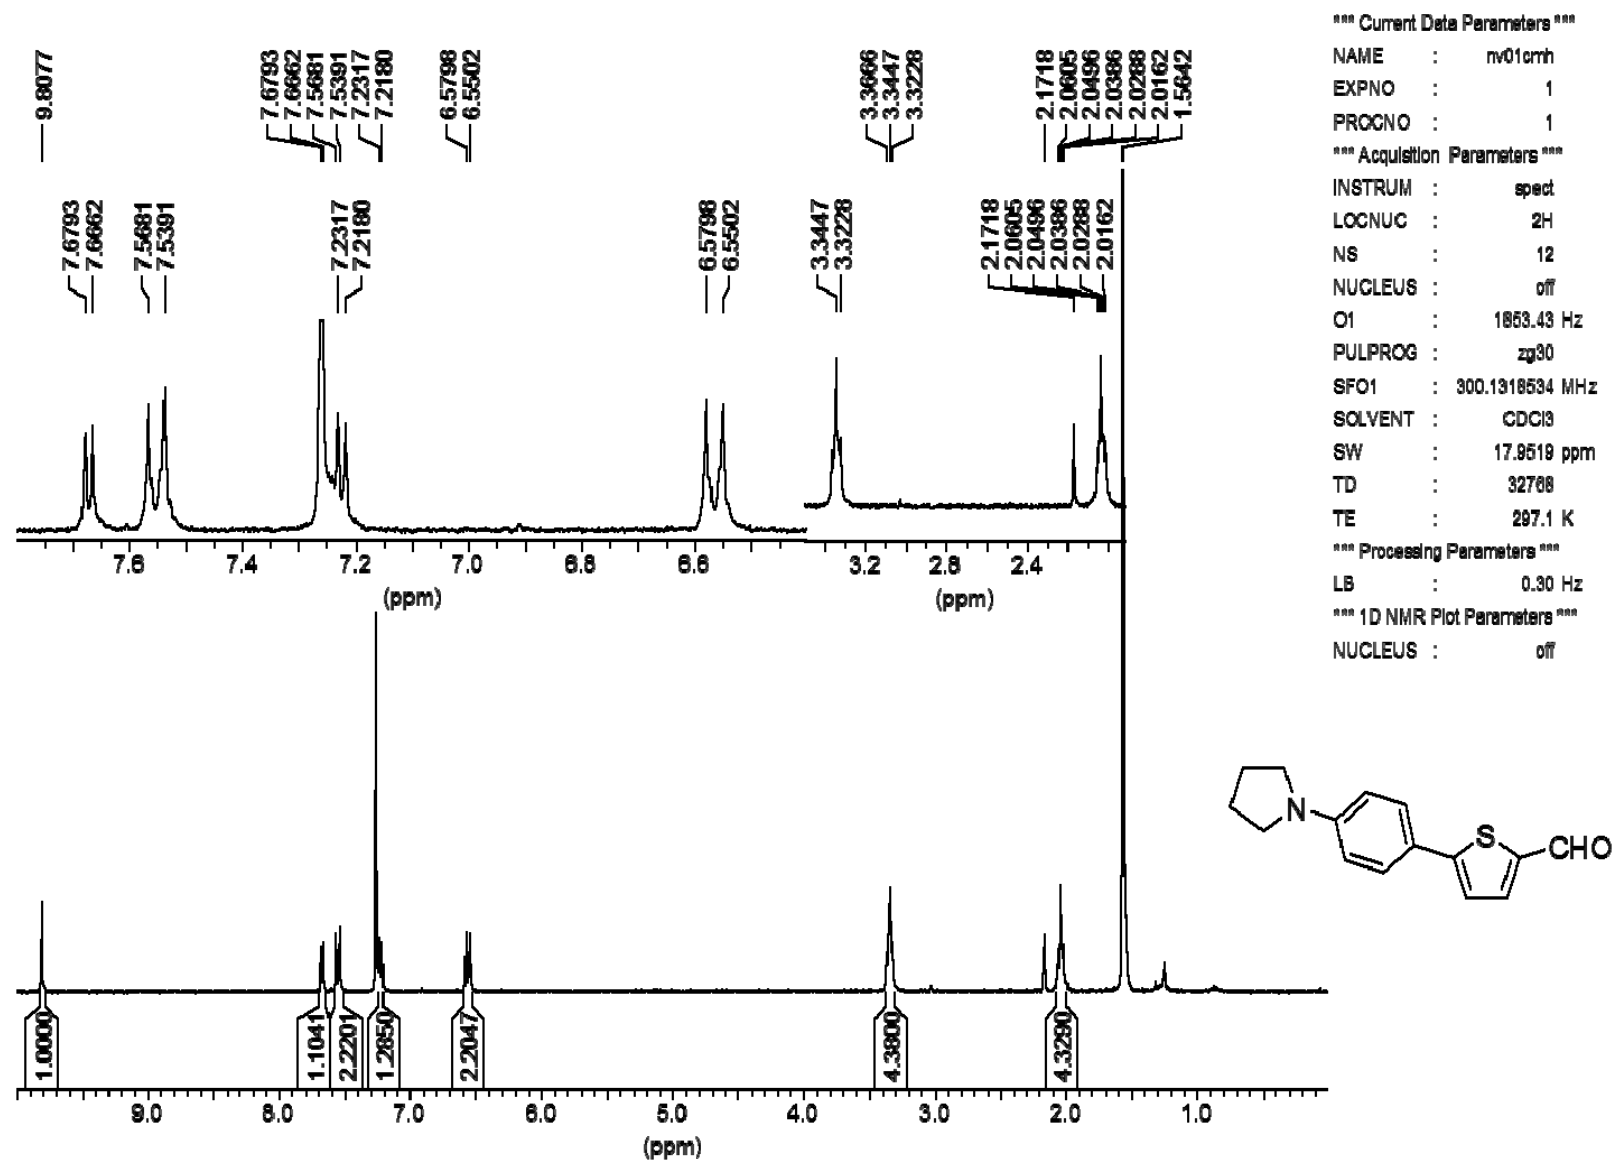

13C MH01082C

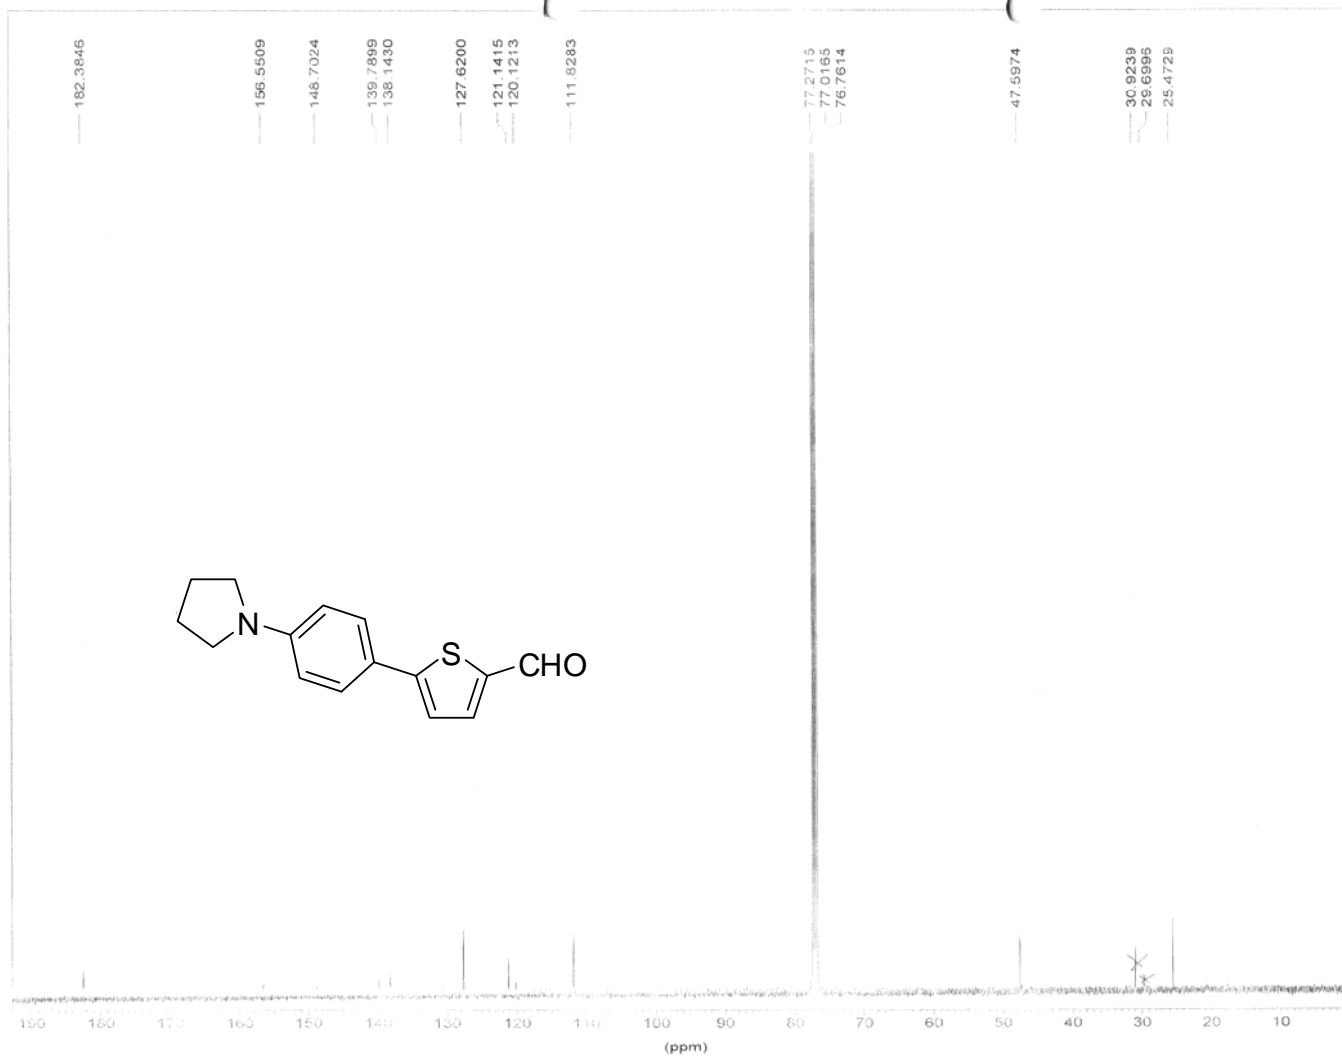

\*\*\* Current Data Parameters \*\*\*

NAME : ak1103  
EXPNO : 2  
PROCNO : 1

\*\*\* Acquisition Parameters \*\*\*

BF1 : 125.7577890 MHz  
LOCNUC : 2H  
NS : 3815  
O1 : 13204.57 Hz  
PULPROG : zgpg30  
SFO1 : 125.7709936 MHz  
SOLVENT : CDCl3  
SW : 238.7675 ppm

\*\*\* Processing Parameters \*\*\*

LB : 1.00 Hz  
PHC0 : 202.644 degree  
PHC1 : 61.263 degree

# 1H & 13C NMR of compound TC2

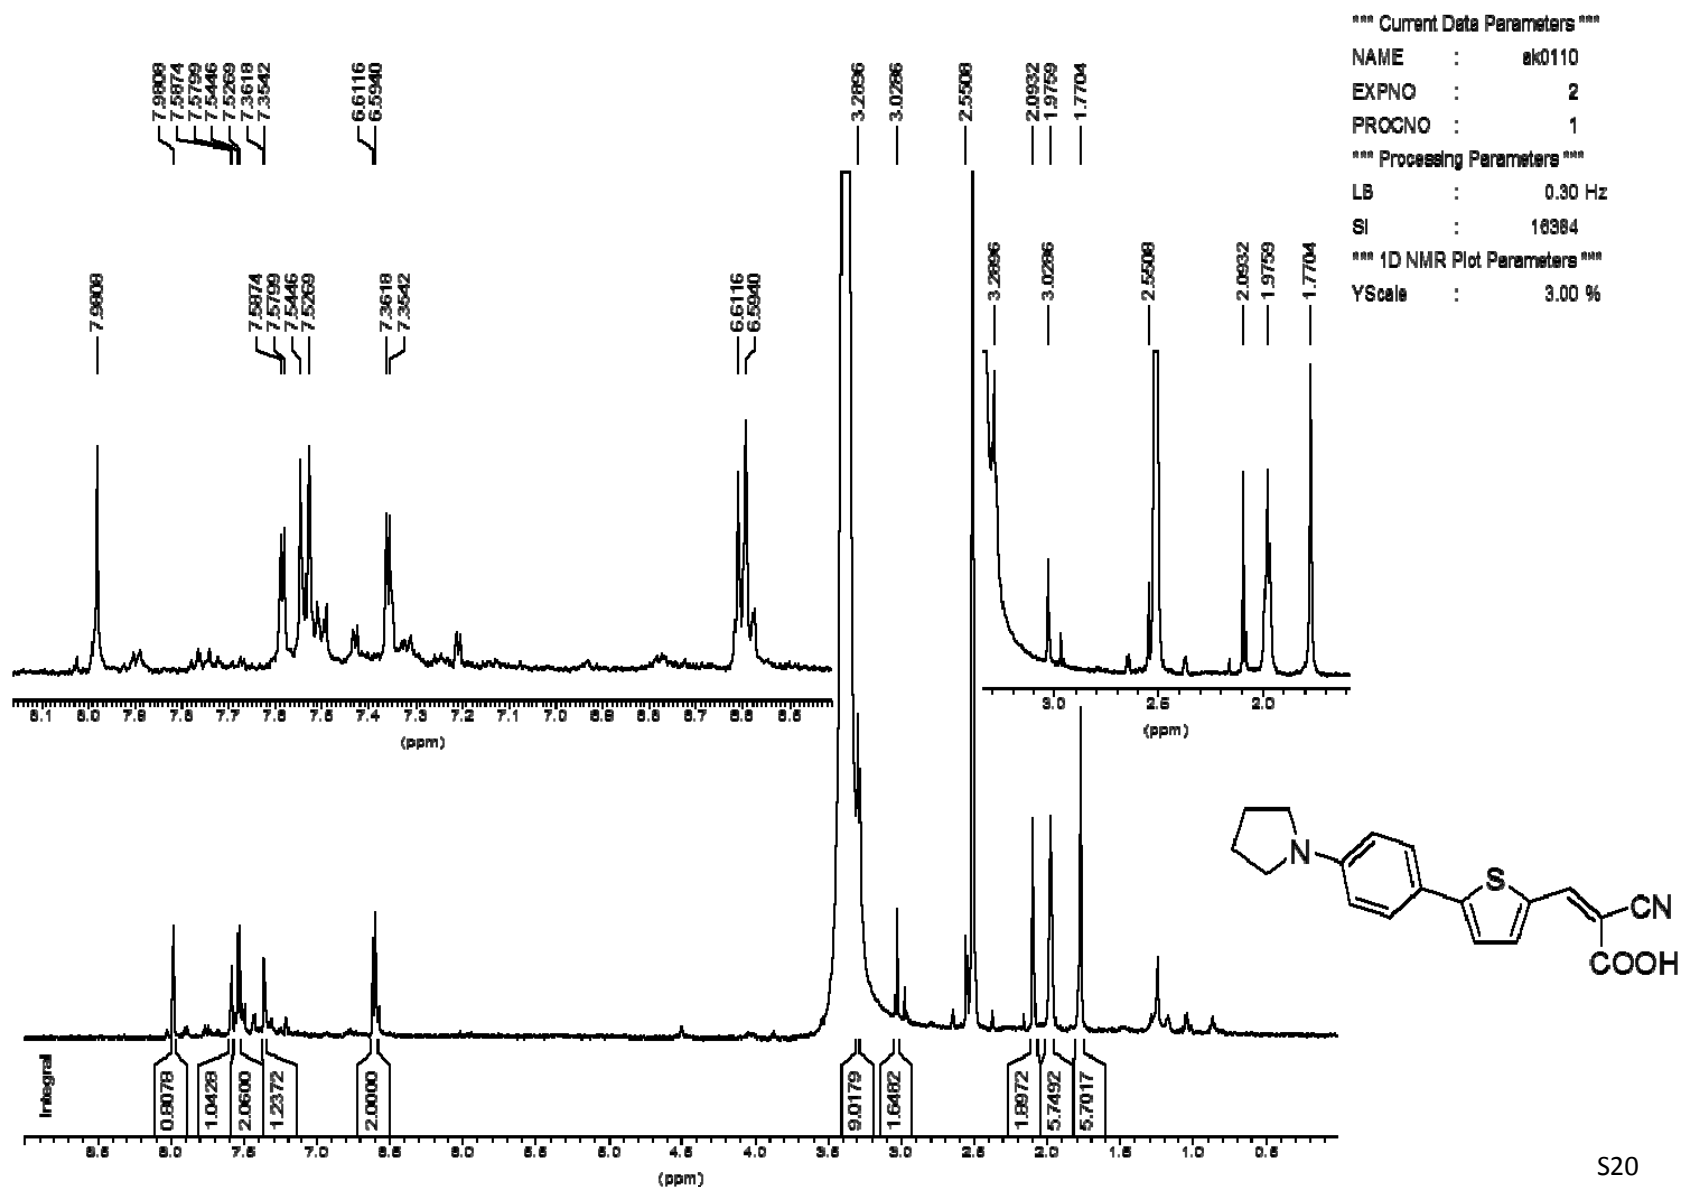

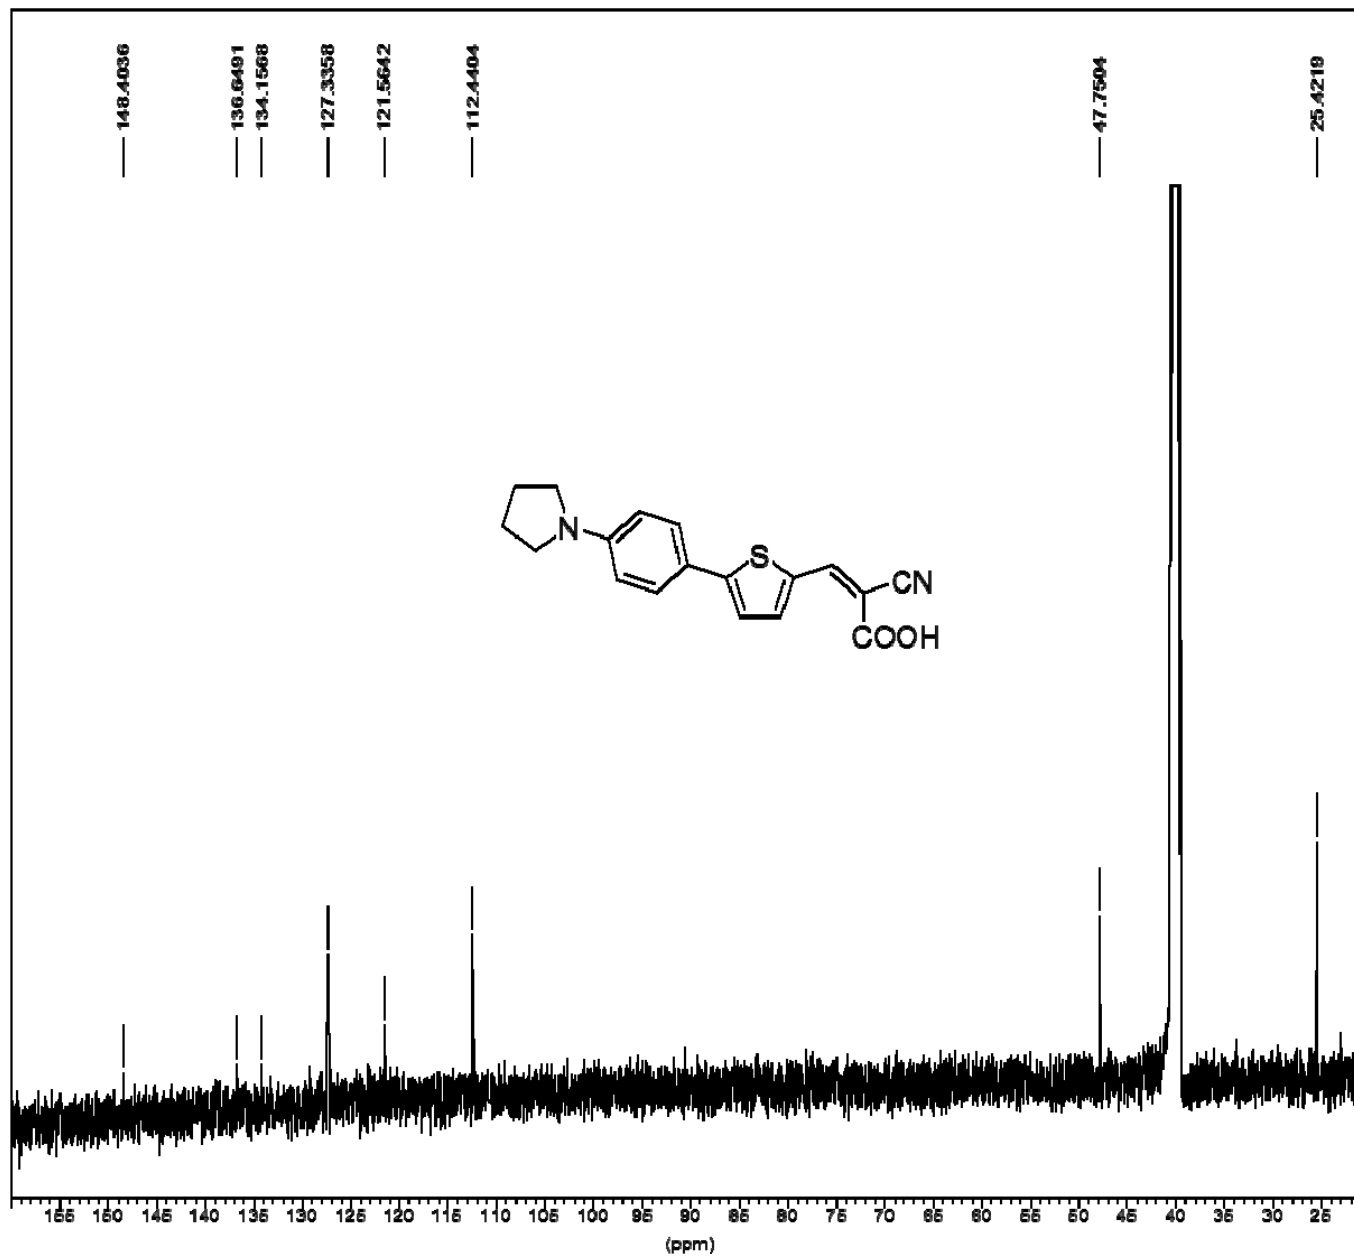

\*\*\* Current Data Parameters \*\*\*

NAME : ak0110

EXPNO : 3

PROCNO : 1

\*\*\* Processing Parameters \*\*\*

LB : 1.00 Hz

SI : 32768

\*\*\* 1D NMR Plot Parameters \*\*\*

YScale : 3.00 %

## FT-IR & MALDI-TOF of compound TC2

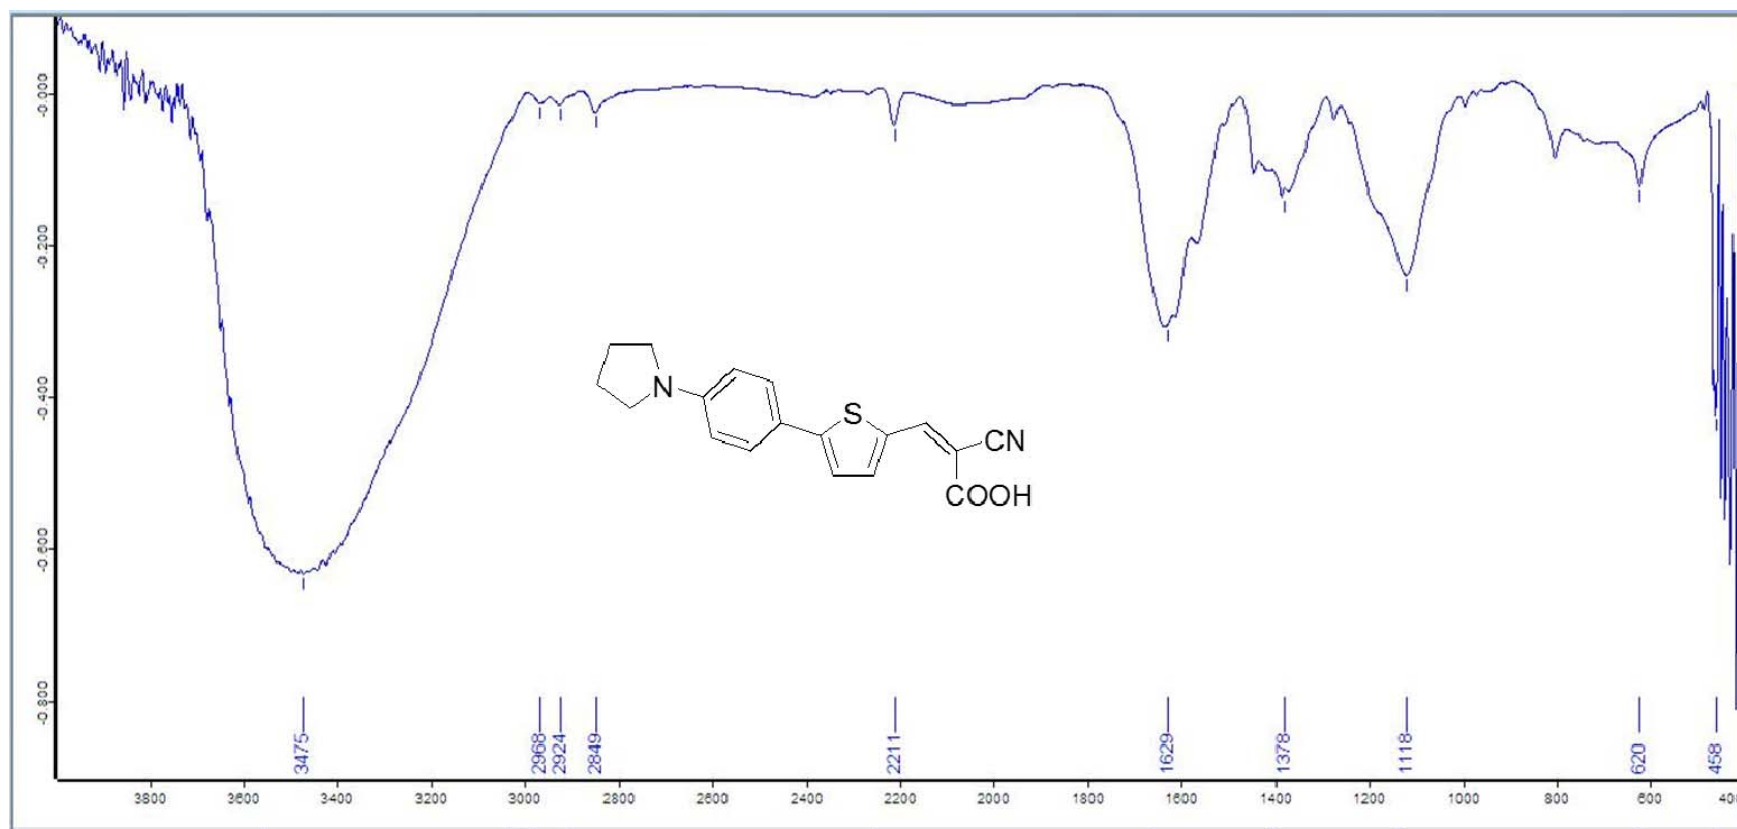

Comment 1

Comment 2

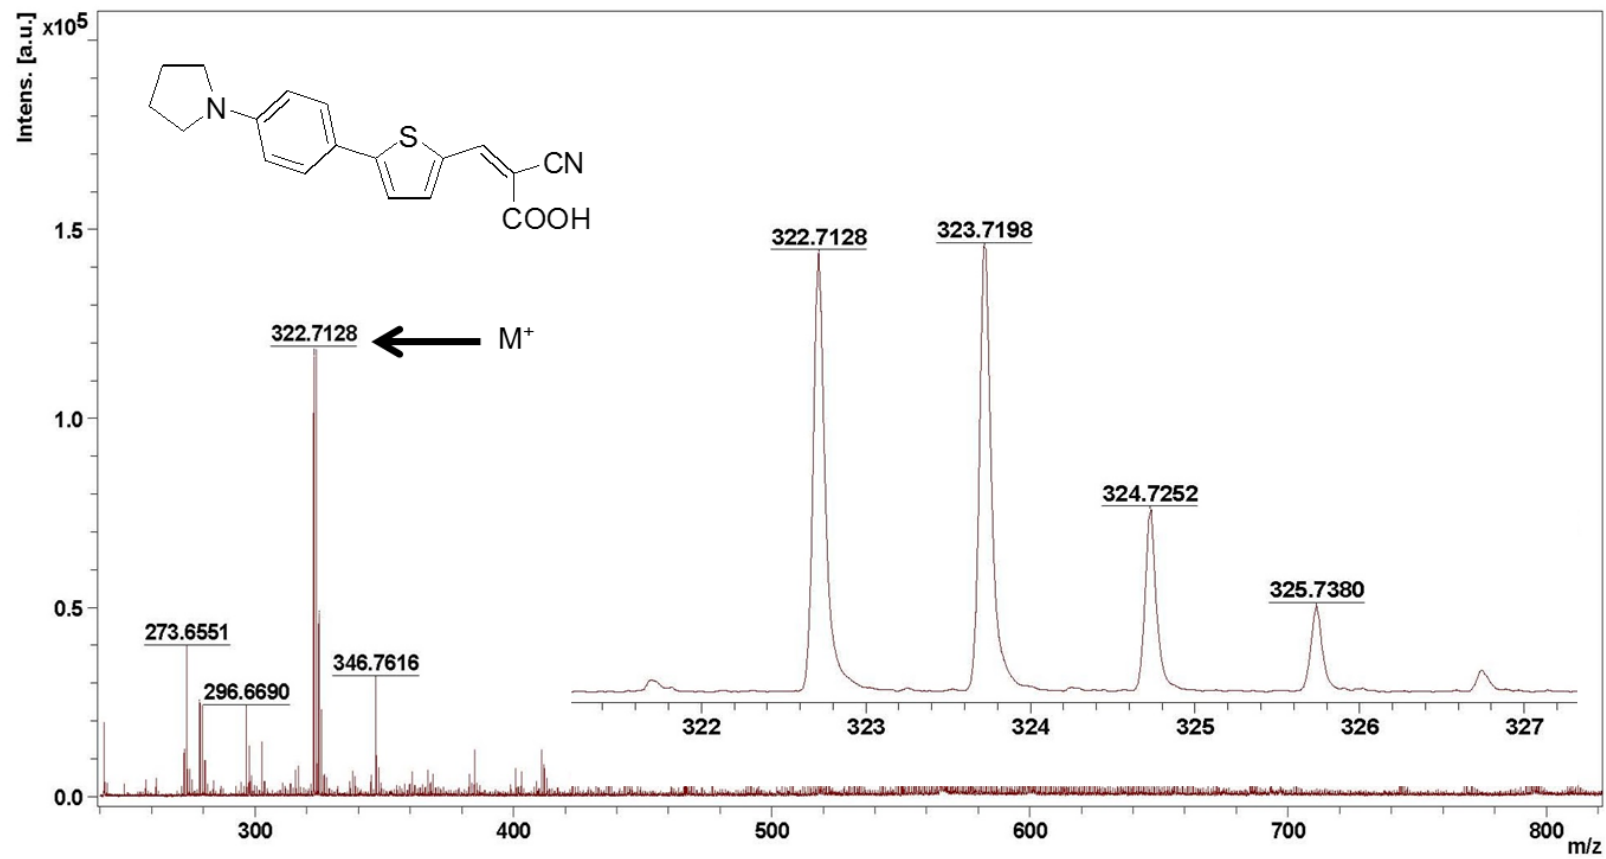

# 1H & 13C NMR of compound 3c

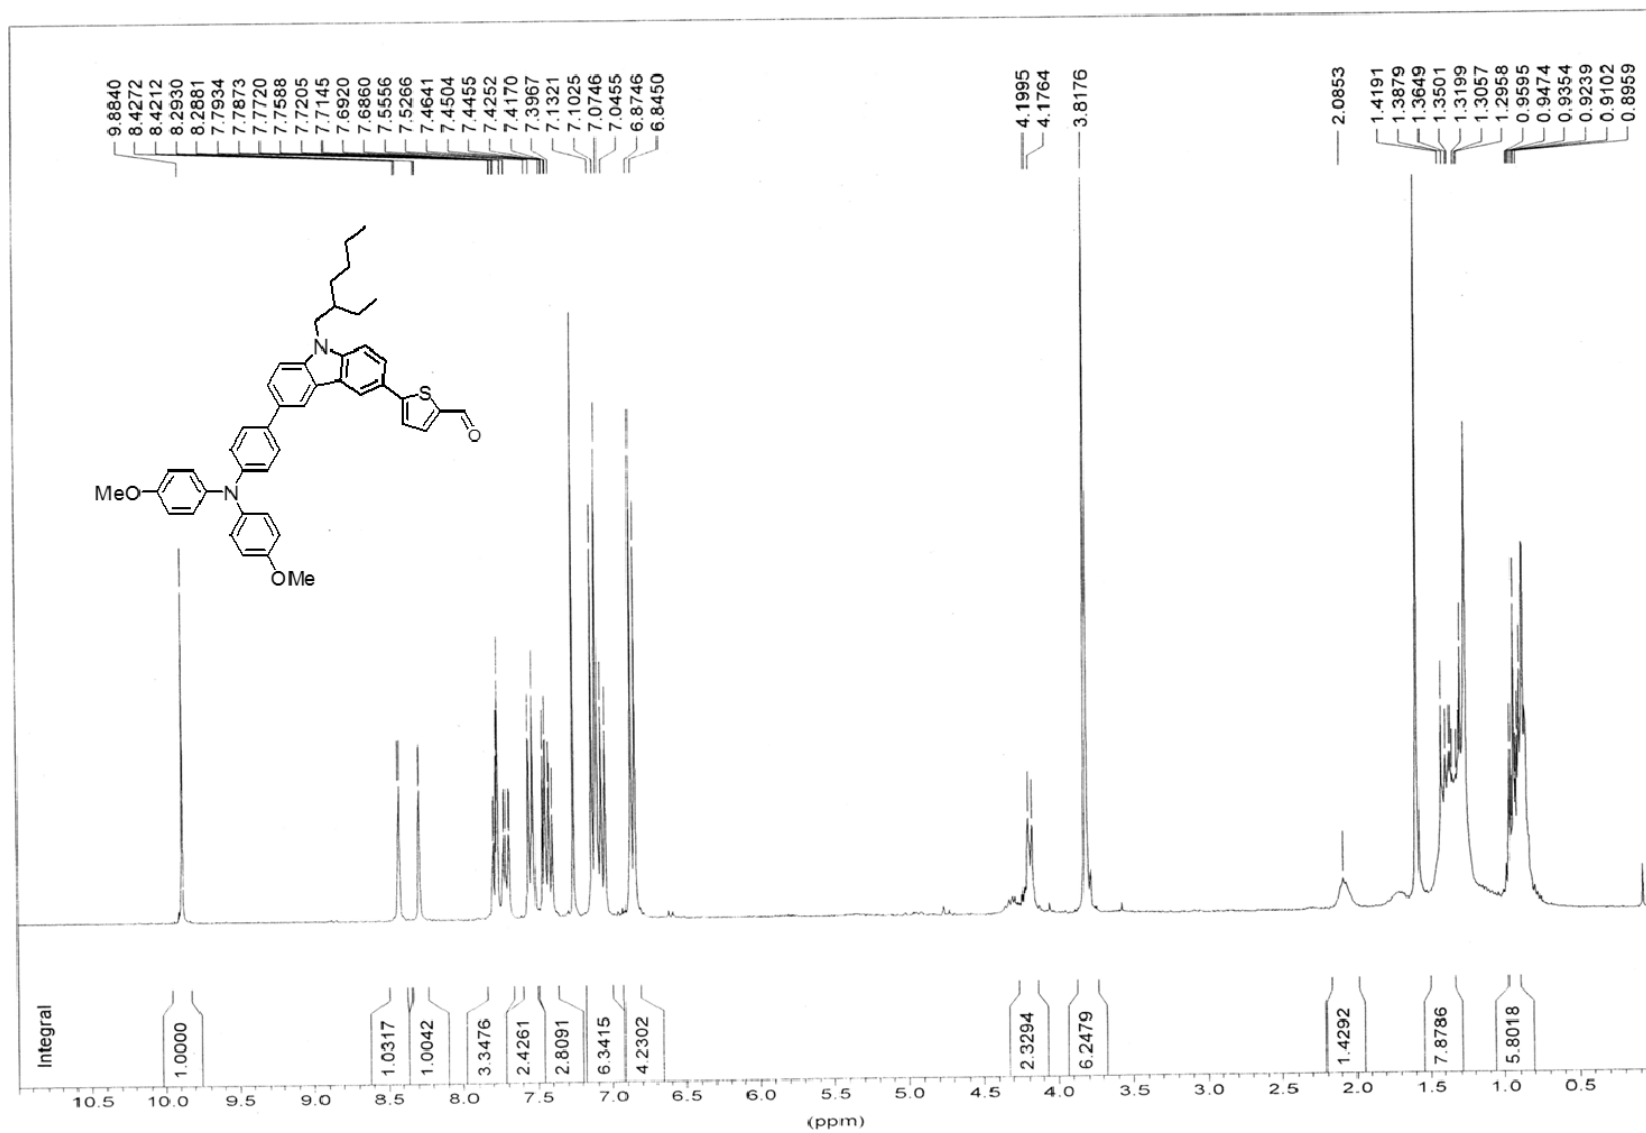



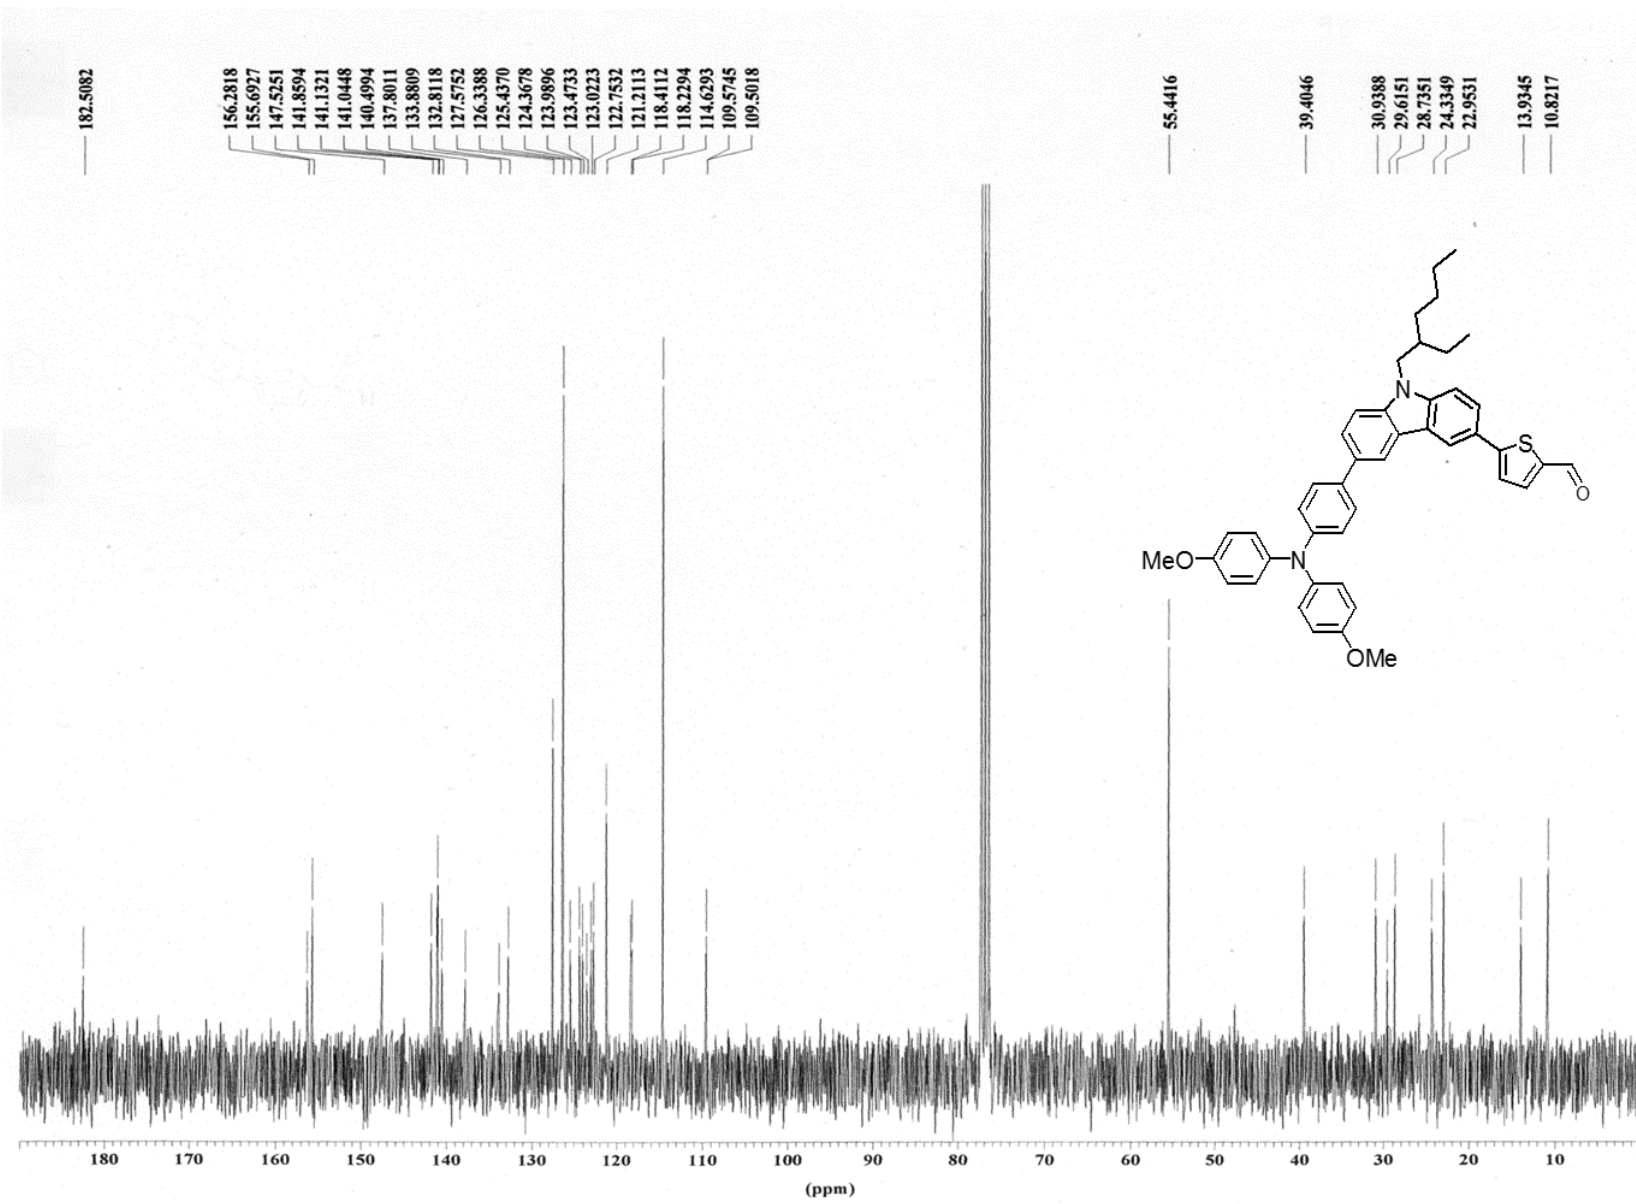

# Mass spectra of compound 3c

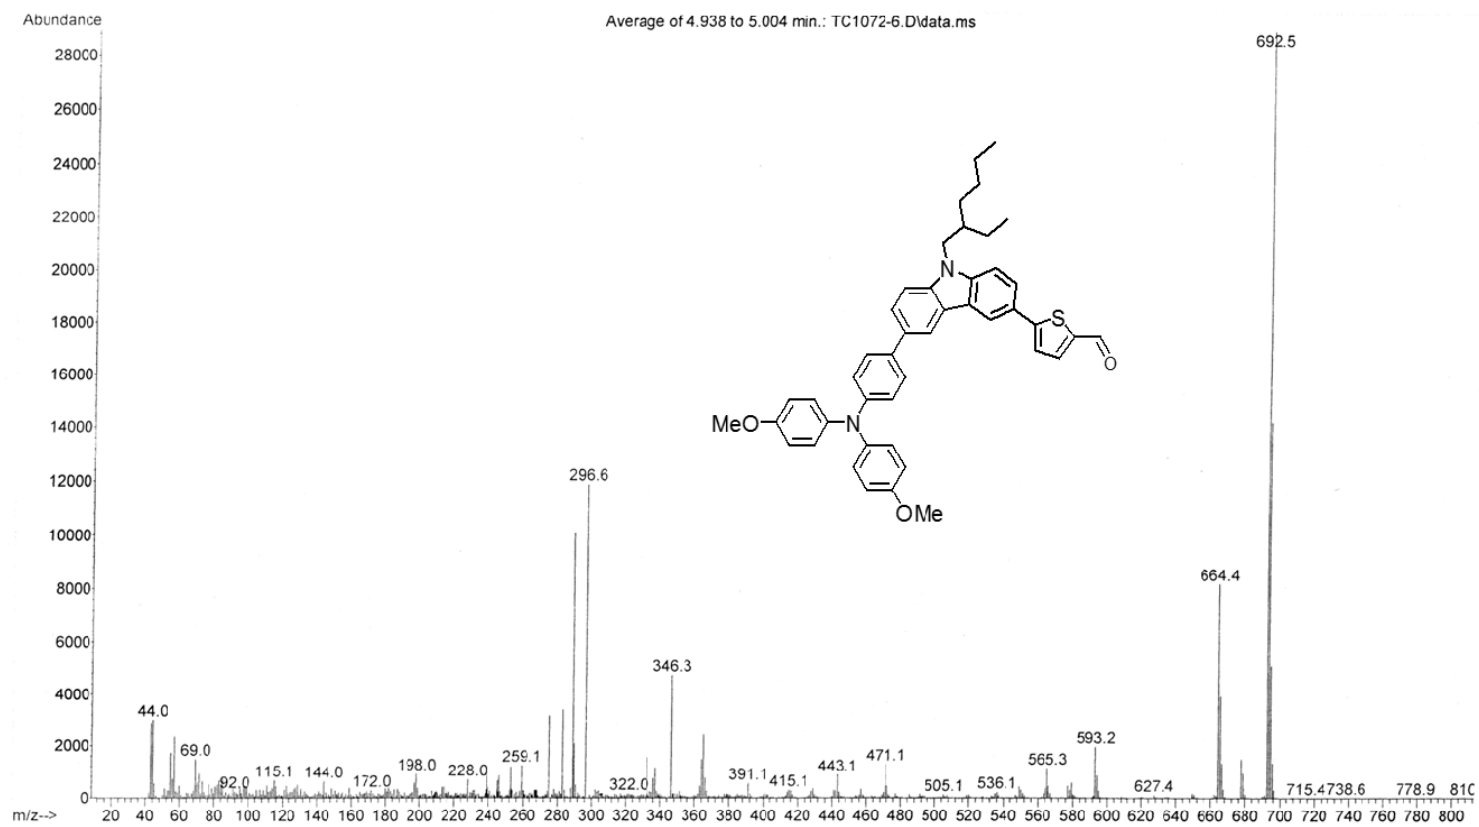

# 1H & 13C NMR of compound TC3

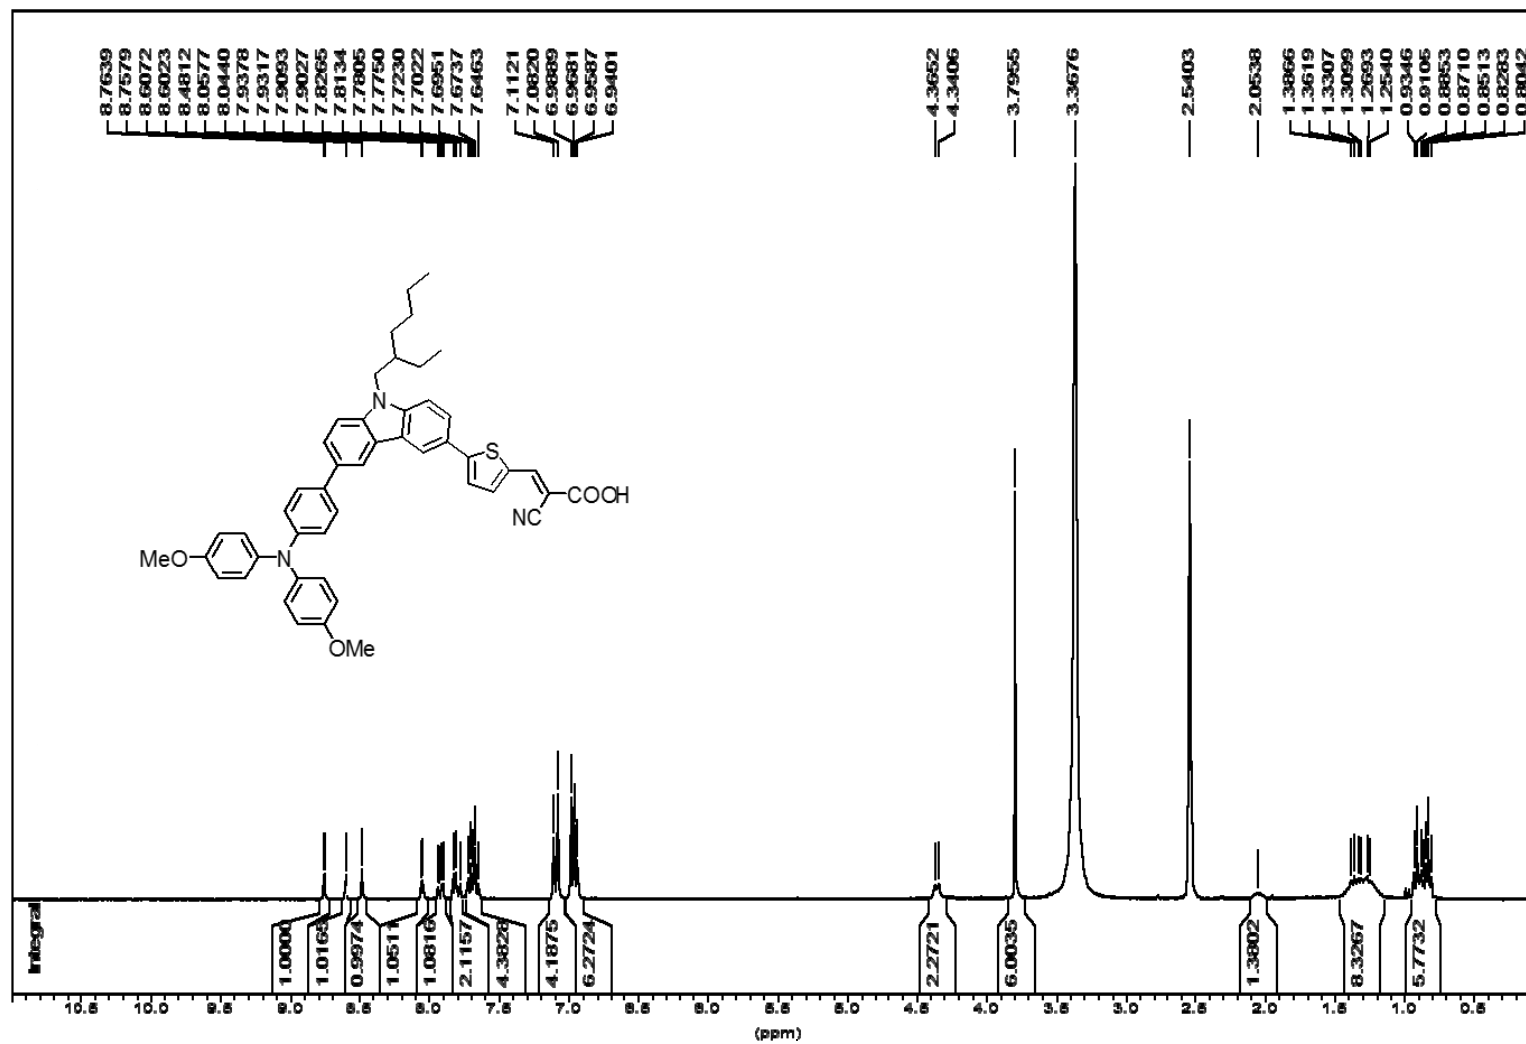

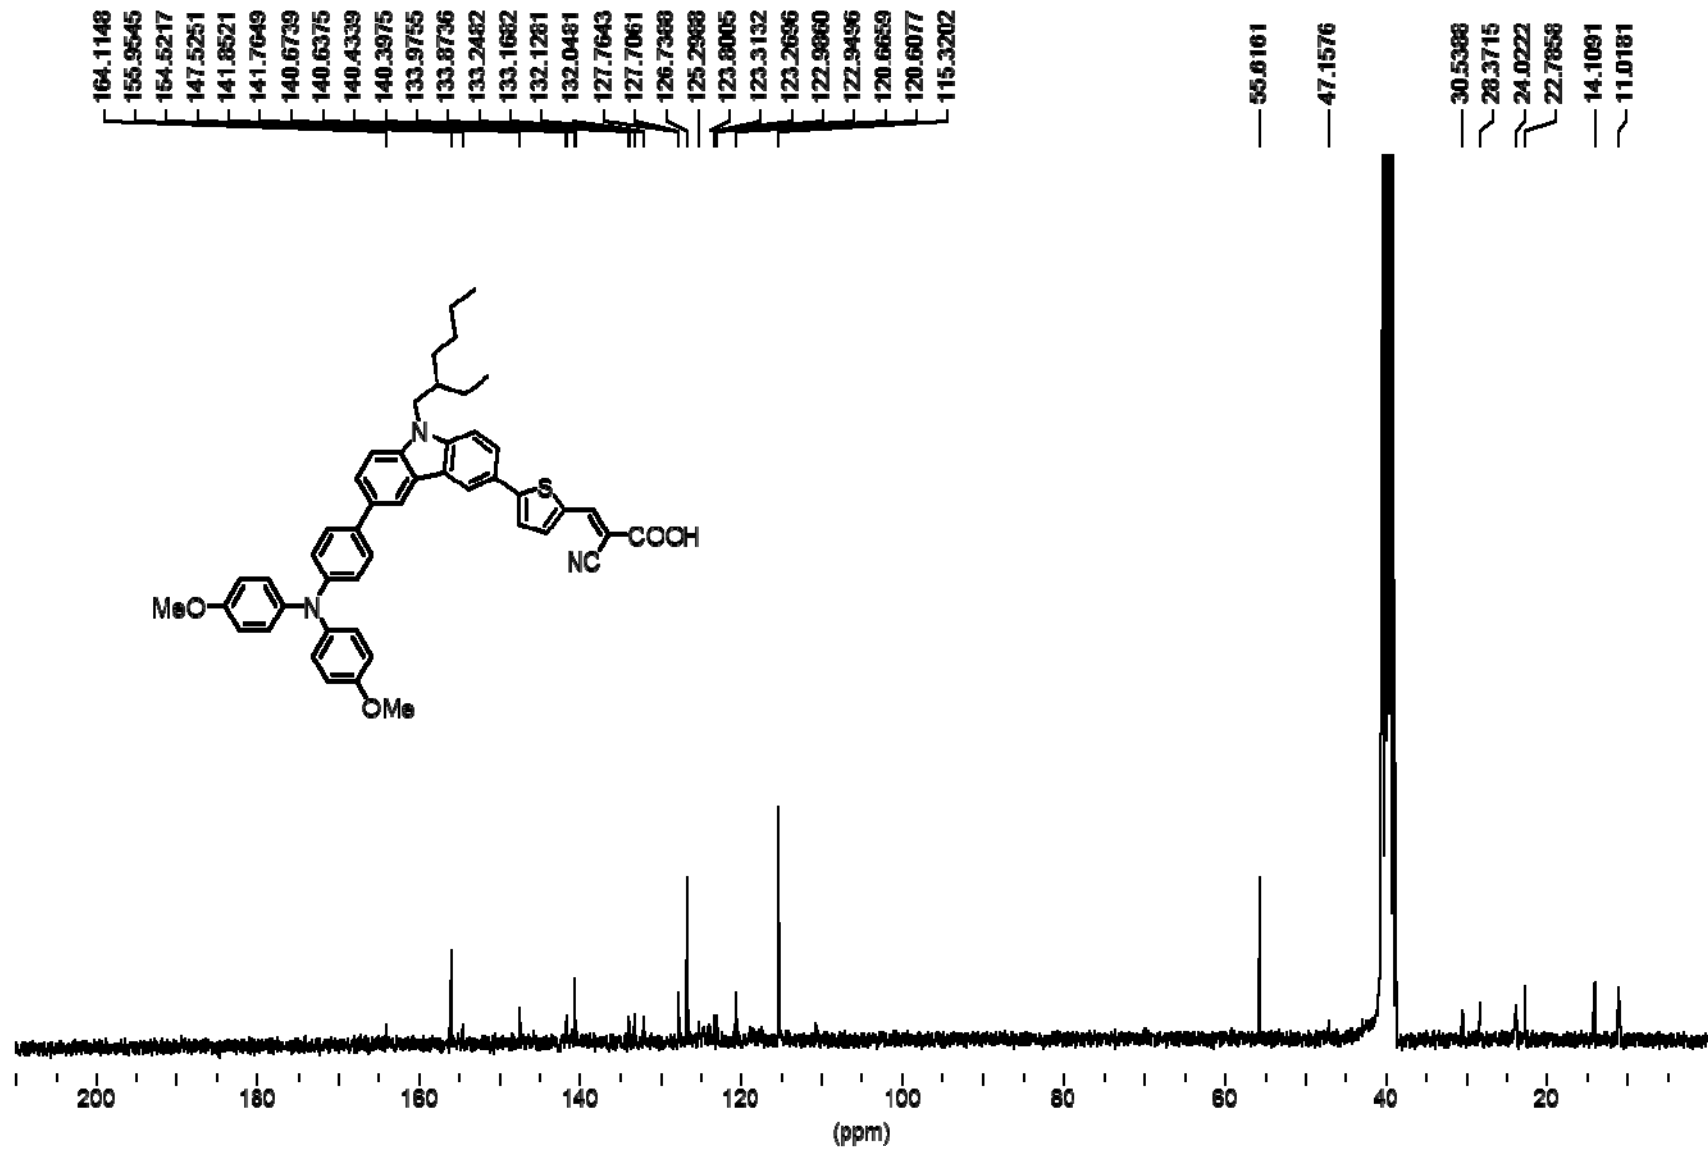

# FT-IR & MALDI-TOF of compound TC3

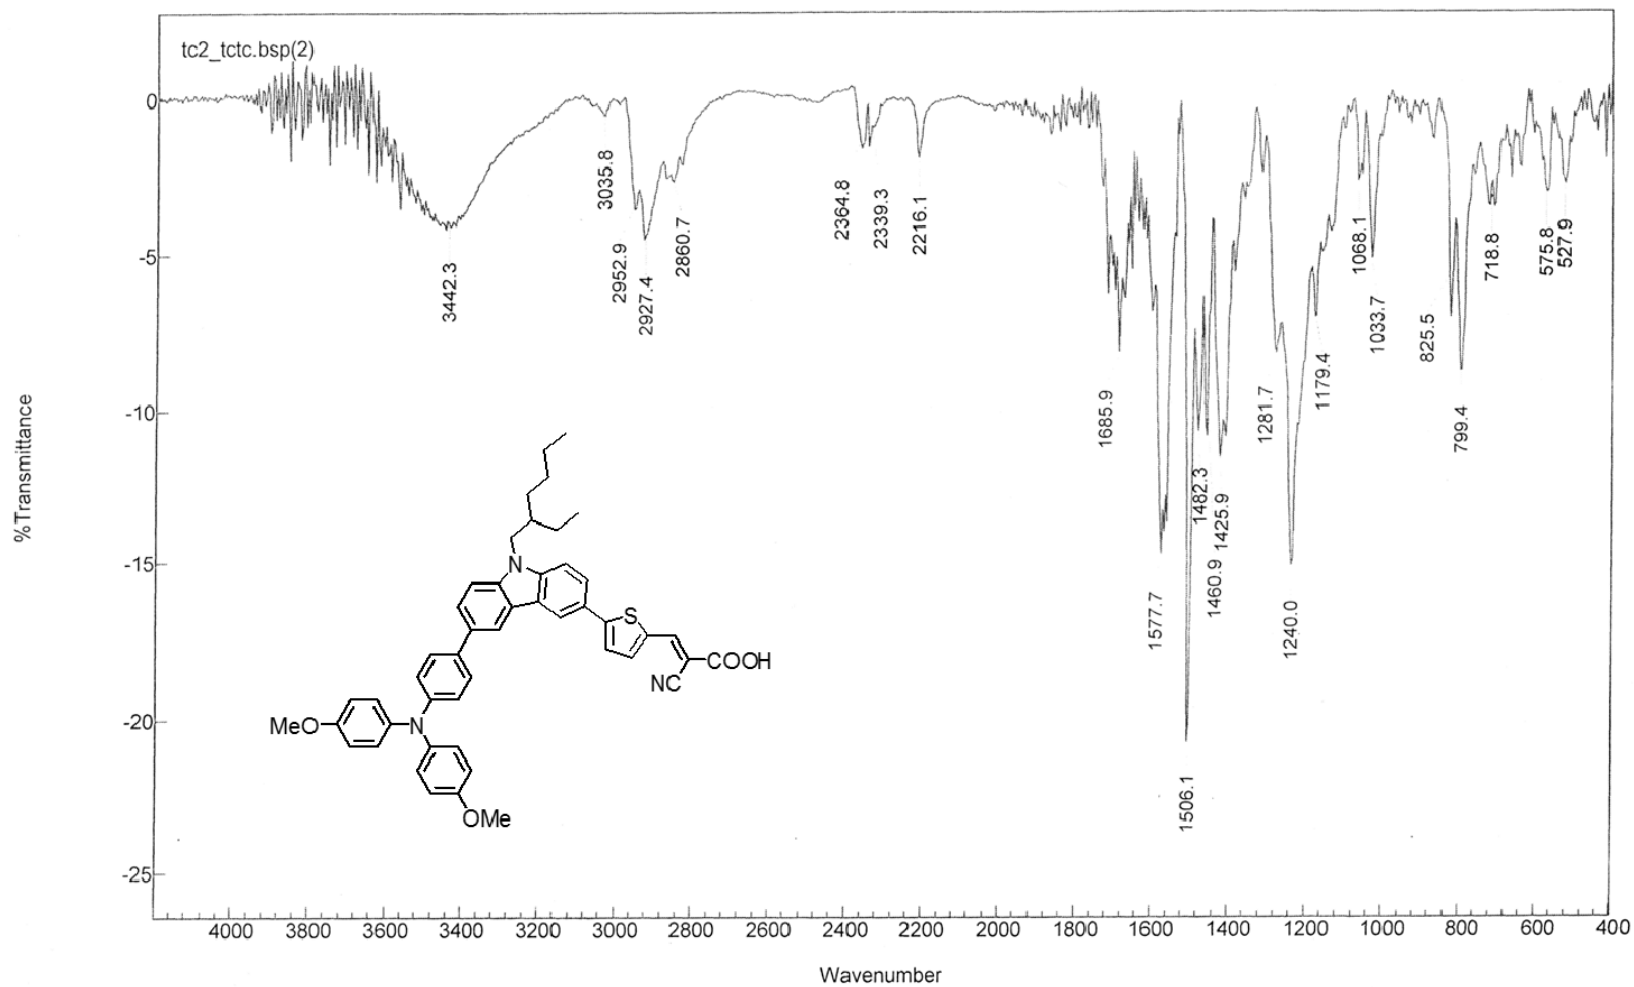

Comment 1

Comment 2

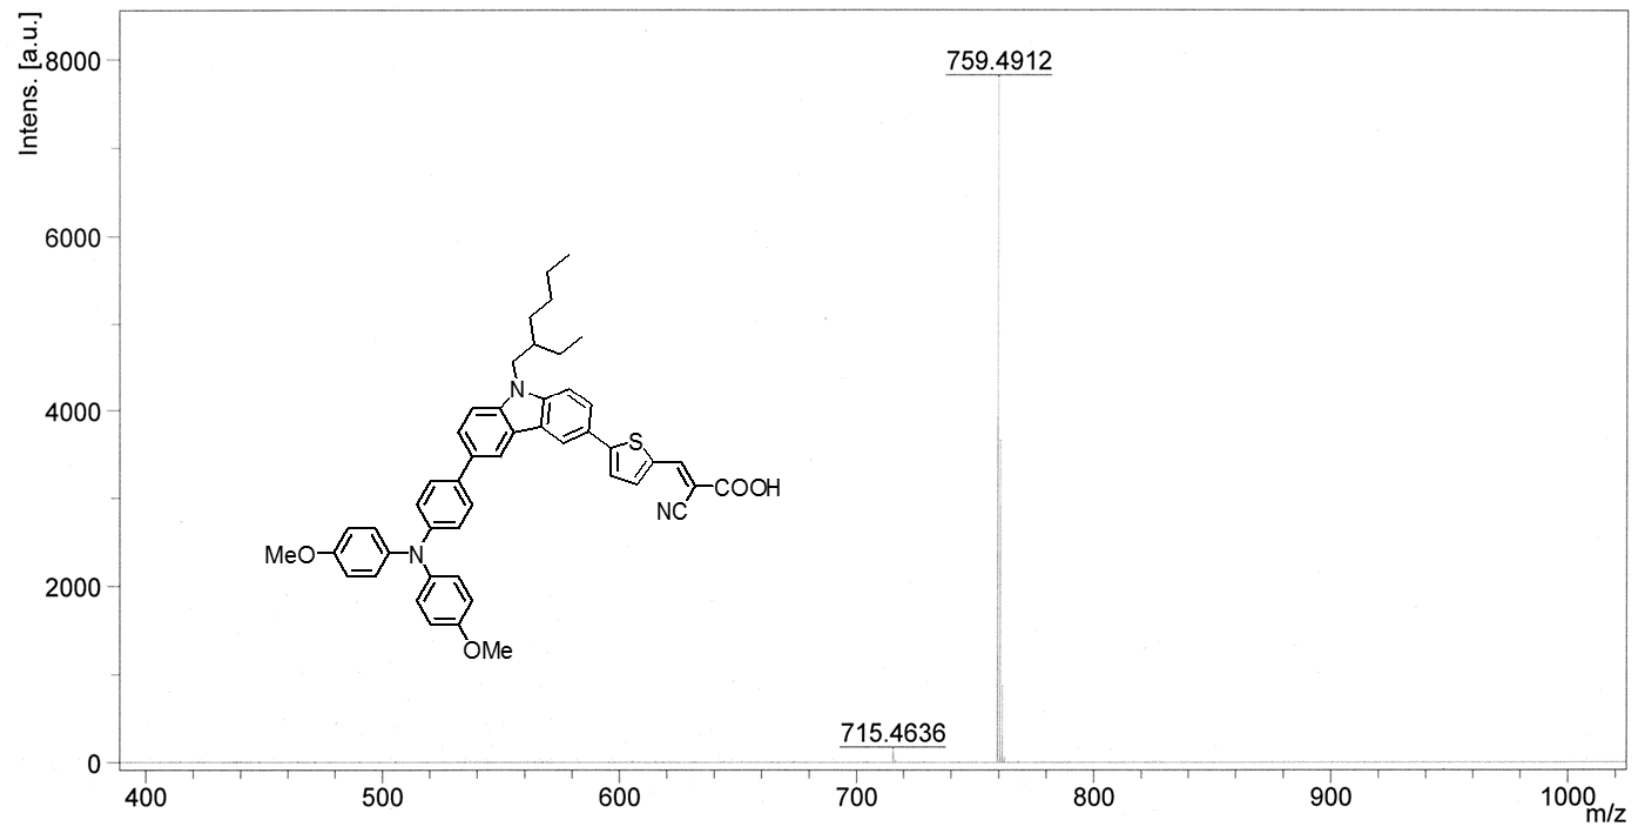

# 1H & 13C NMR of compound 3b

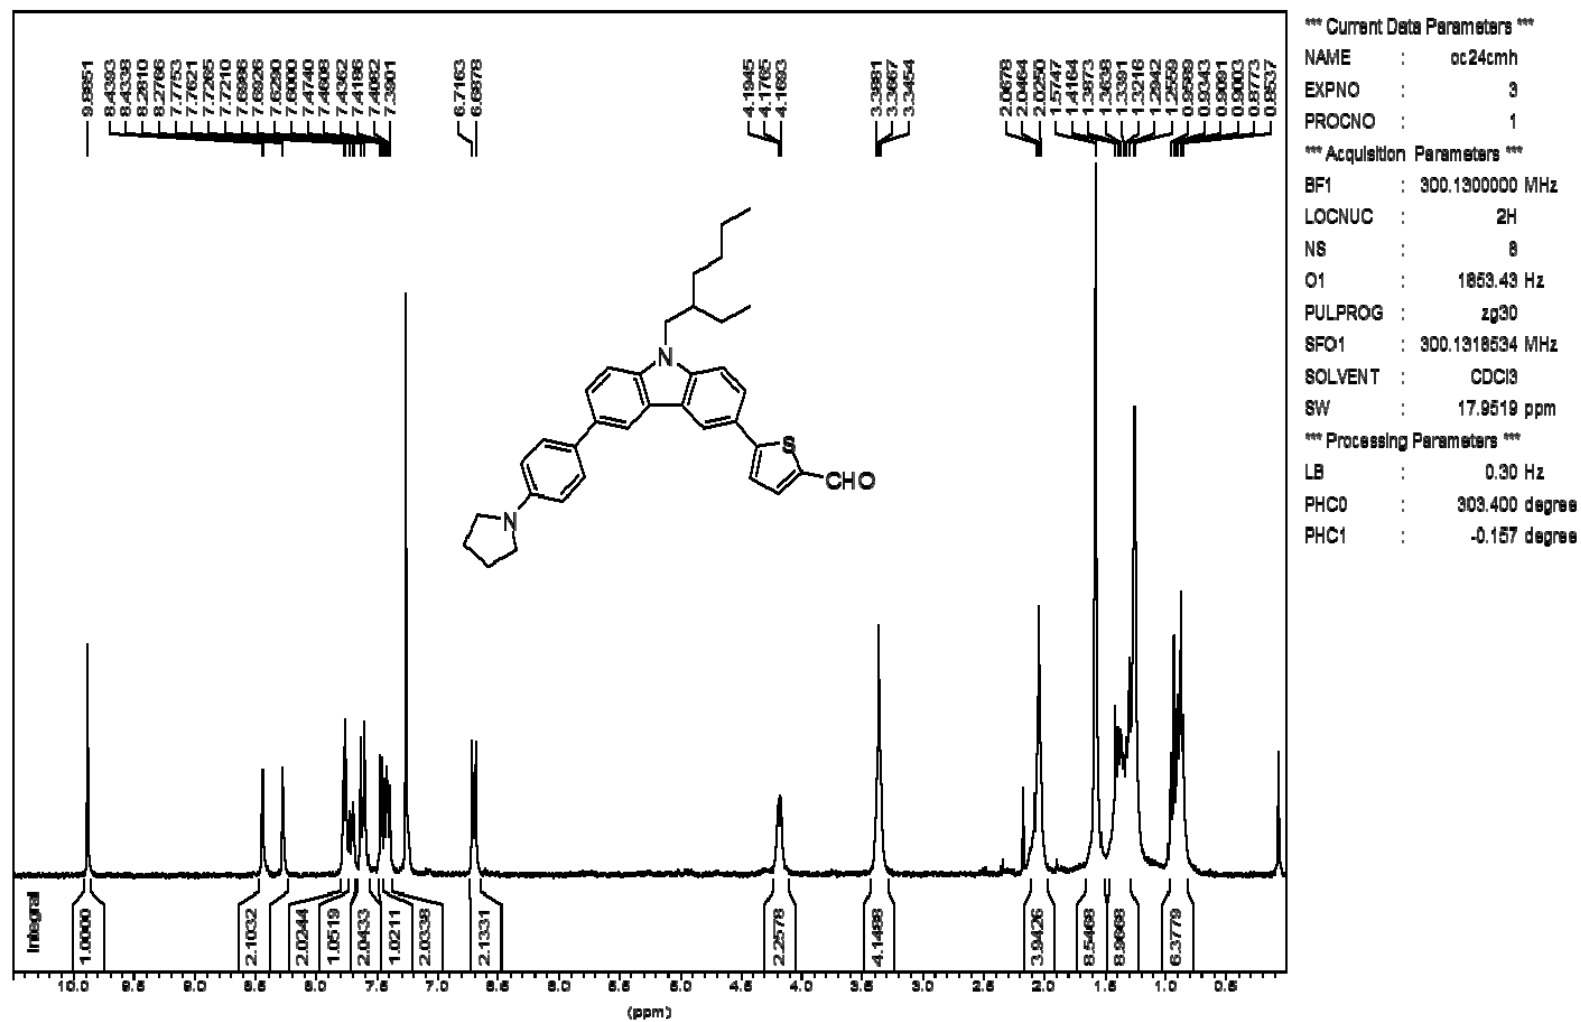

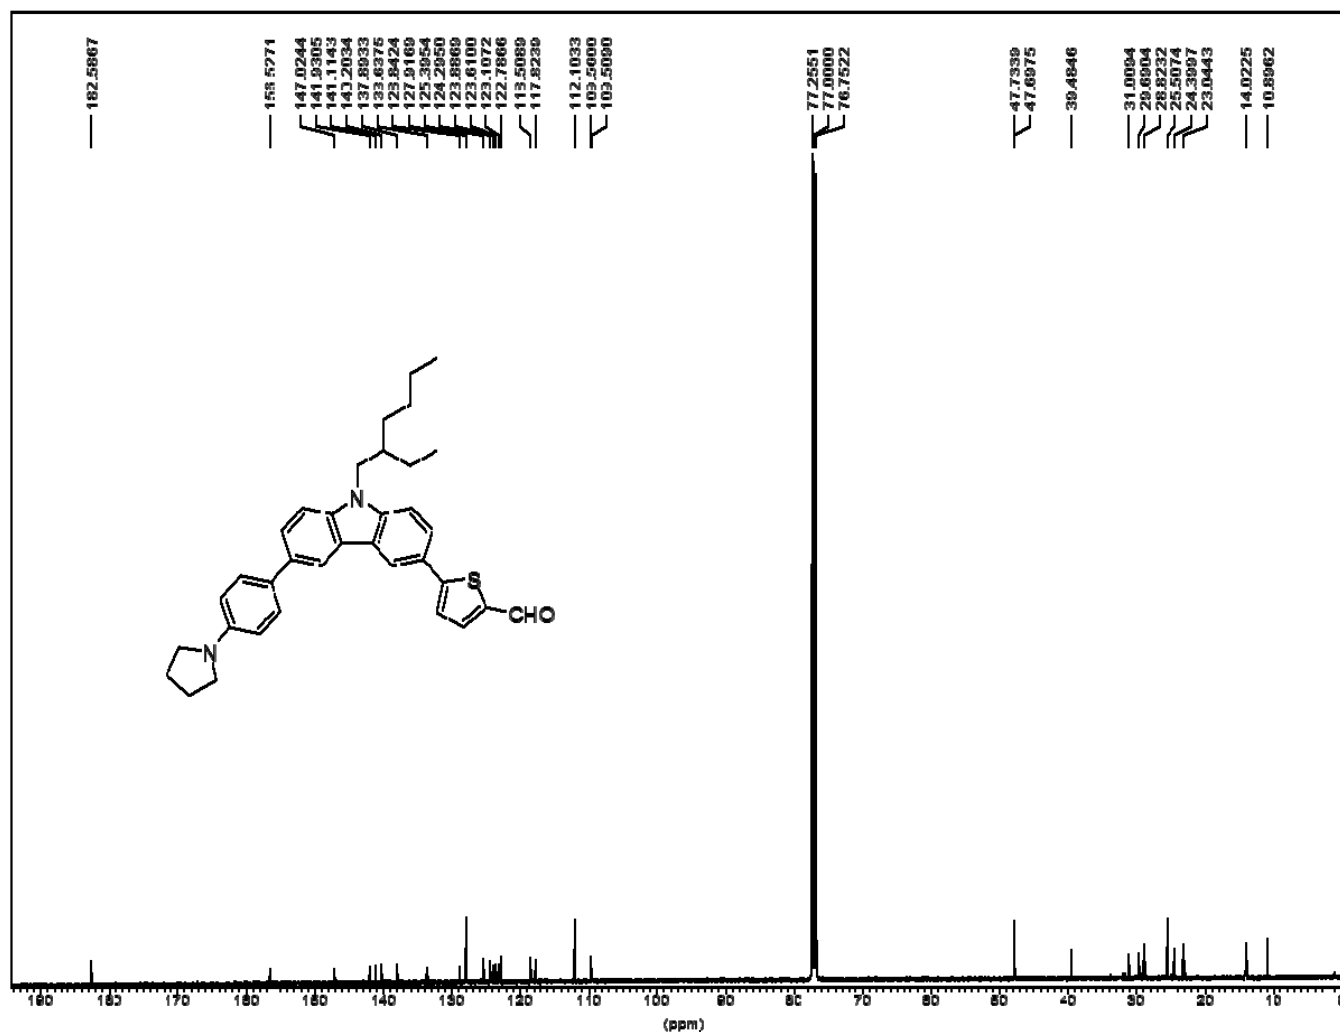

\*\*\* Current Data Parameters \*\*\*

NAME : ak1024  
 EXPNO : 2  
 PROCNC : 1

\*\*\* Acquisition Parameters \*\*\*

BF1 : 125.7577890 MHz  
 LOCNUC : 2H  
 NS : 10828  
 O1 : 13204.57 Hz  
 PULPROG : zgpg30  
 SFO1 : 125.7706938 MHz  
 SOLVENT : CDCl3  
 SW : 238.7875 ppm

\*\*\* Processing Parameters \*\*\*

LB : 1.00 Hz  
 PHC0 : 183.918 degree  
 PHC1 : 21.028 degree



## Mass spectra of compound **3b**

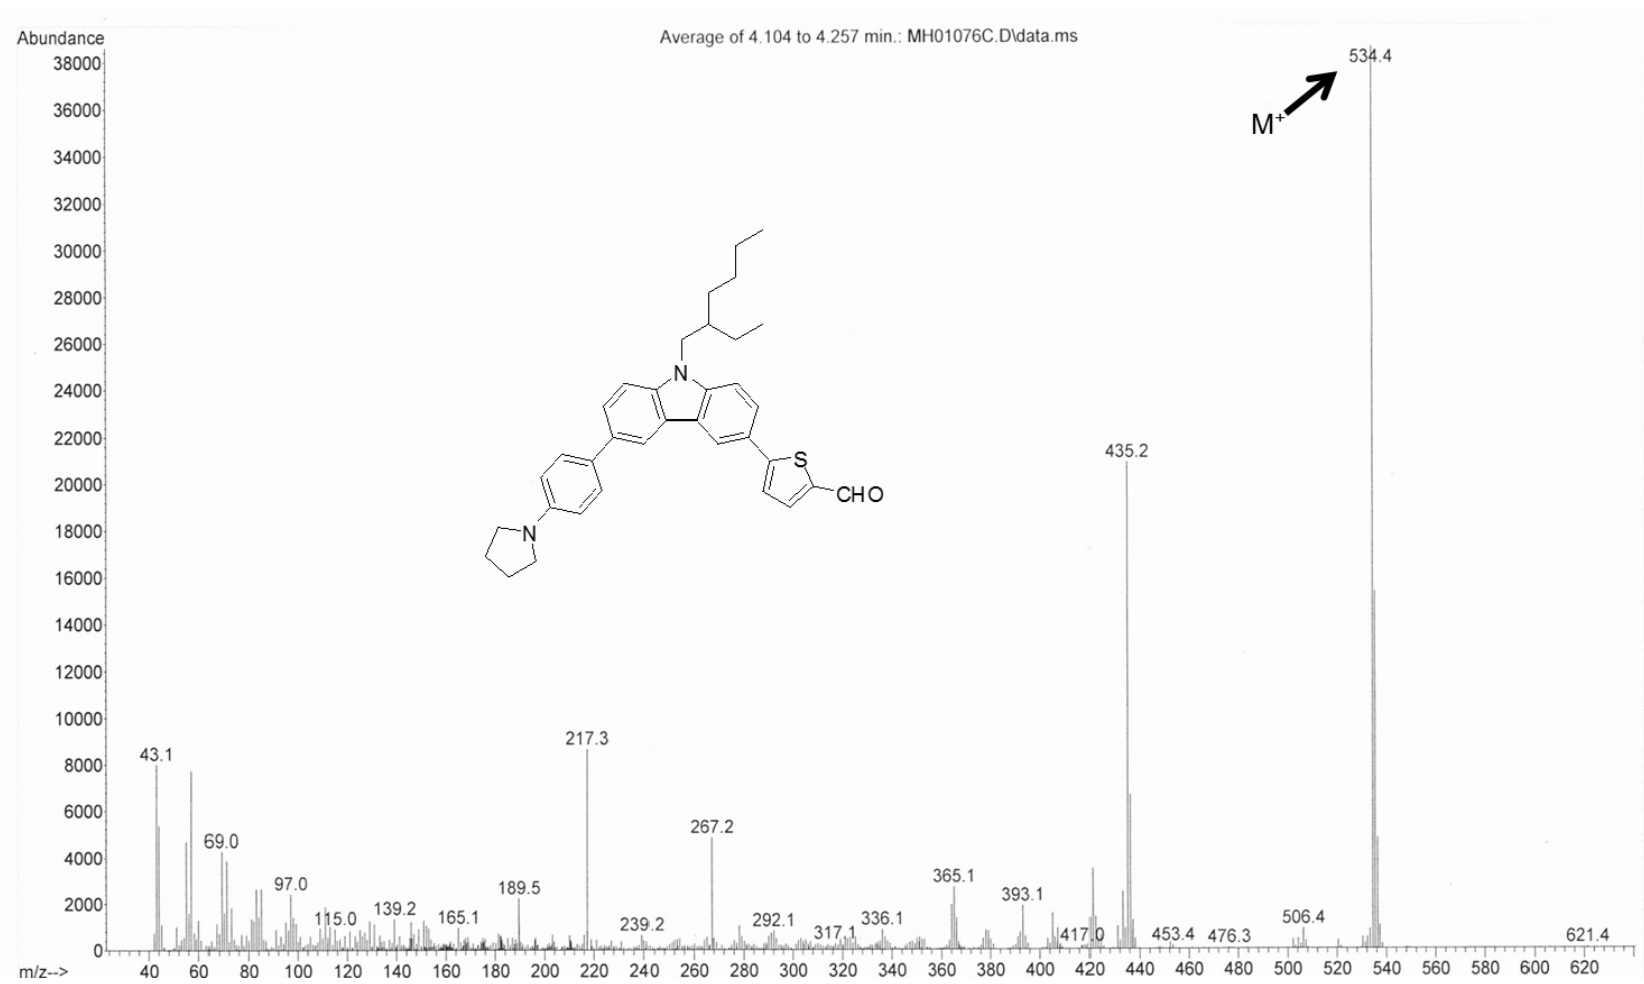

# 1H NMR & FT-IR of compound TC4

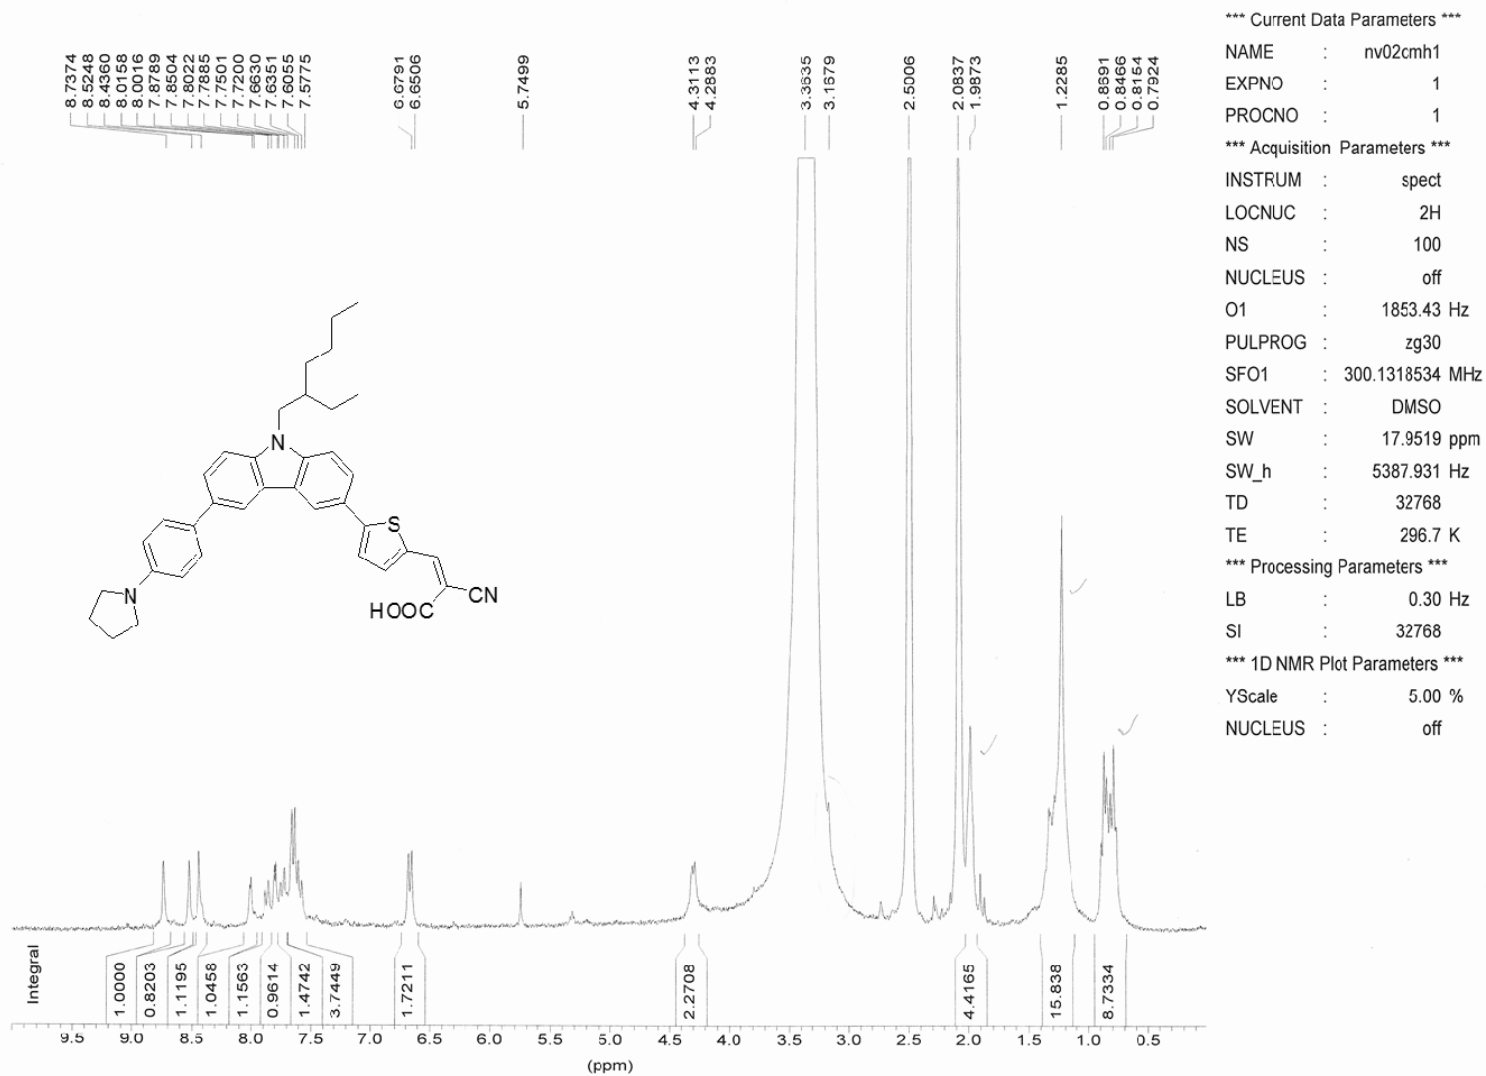

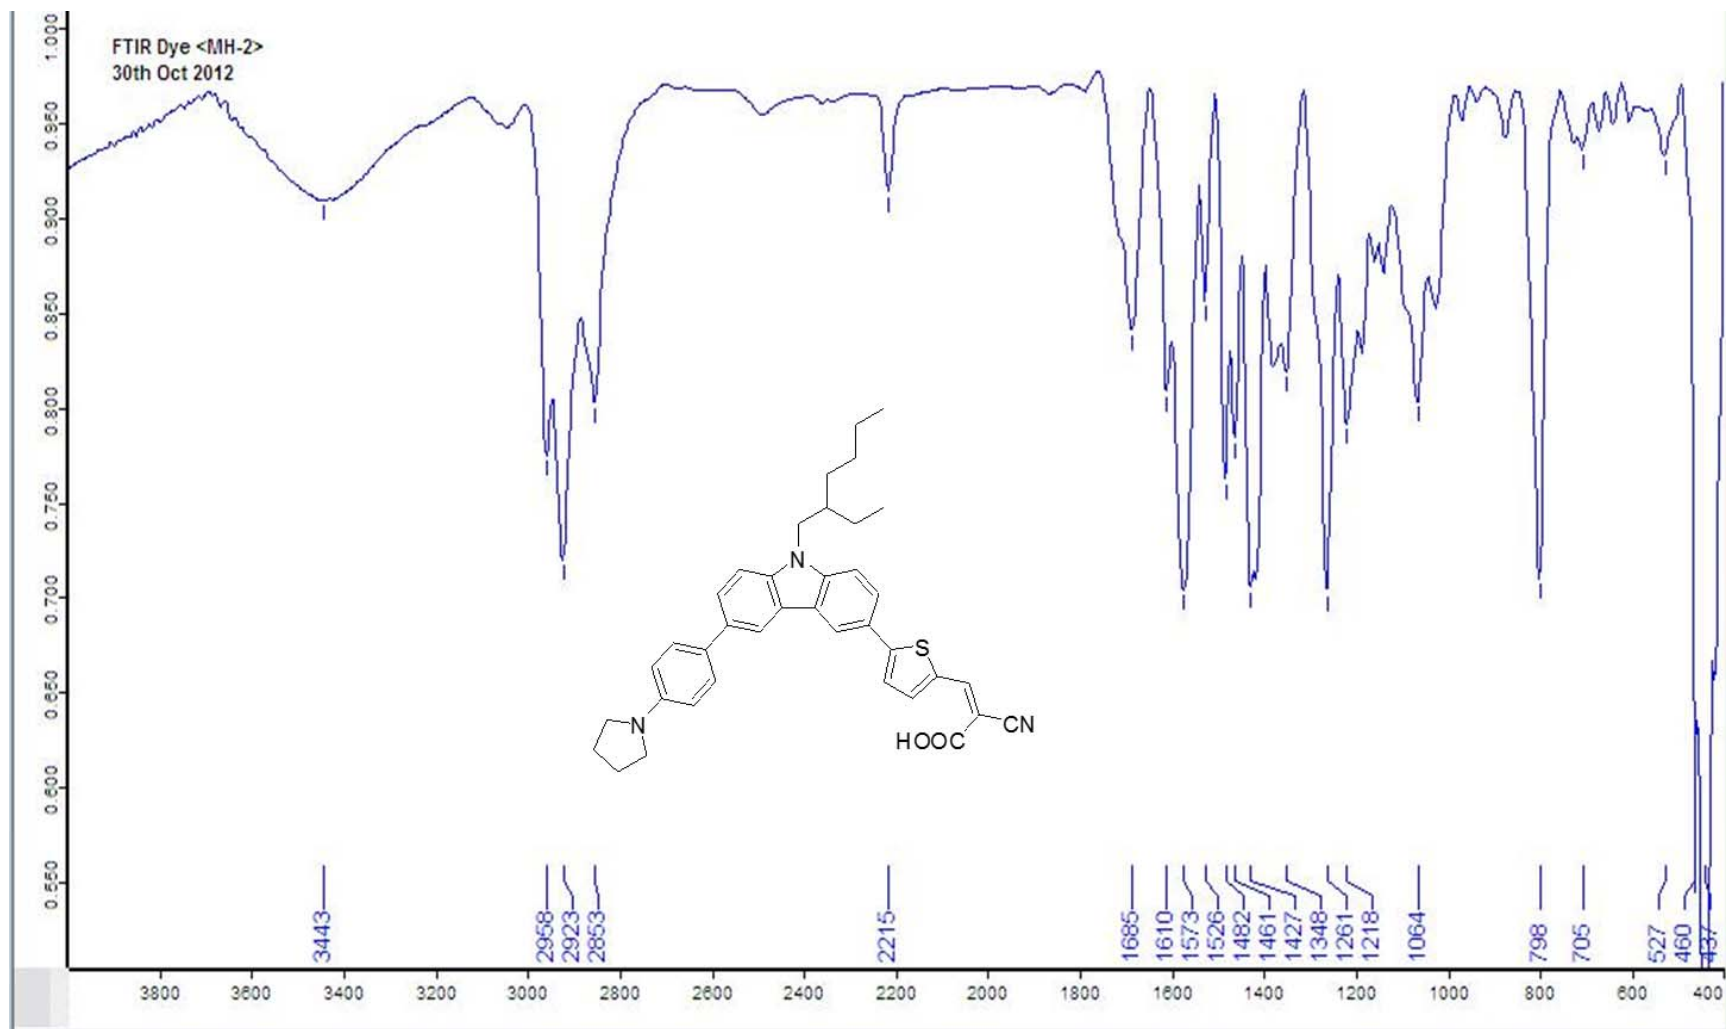

# MALDI-TOF of compound TC4

Comment 1

Comment 2

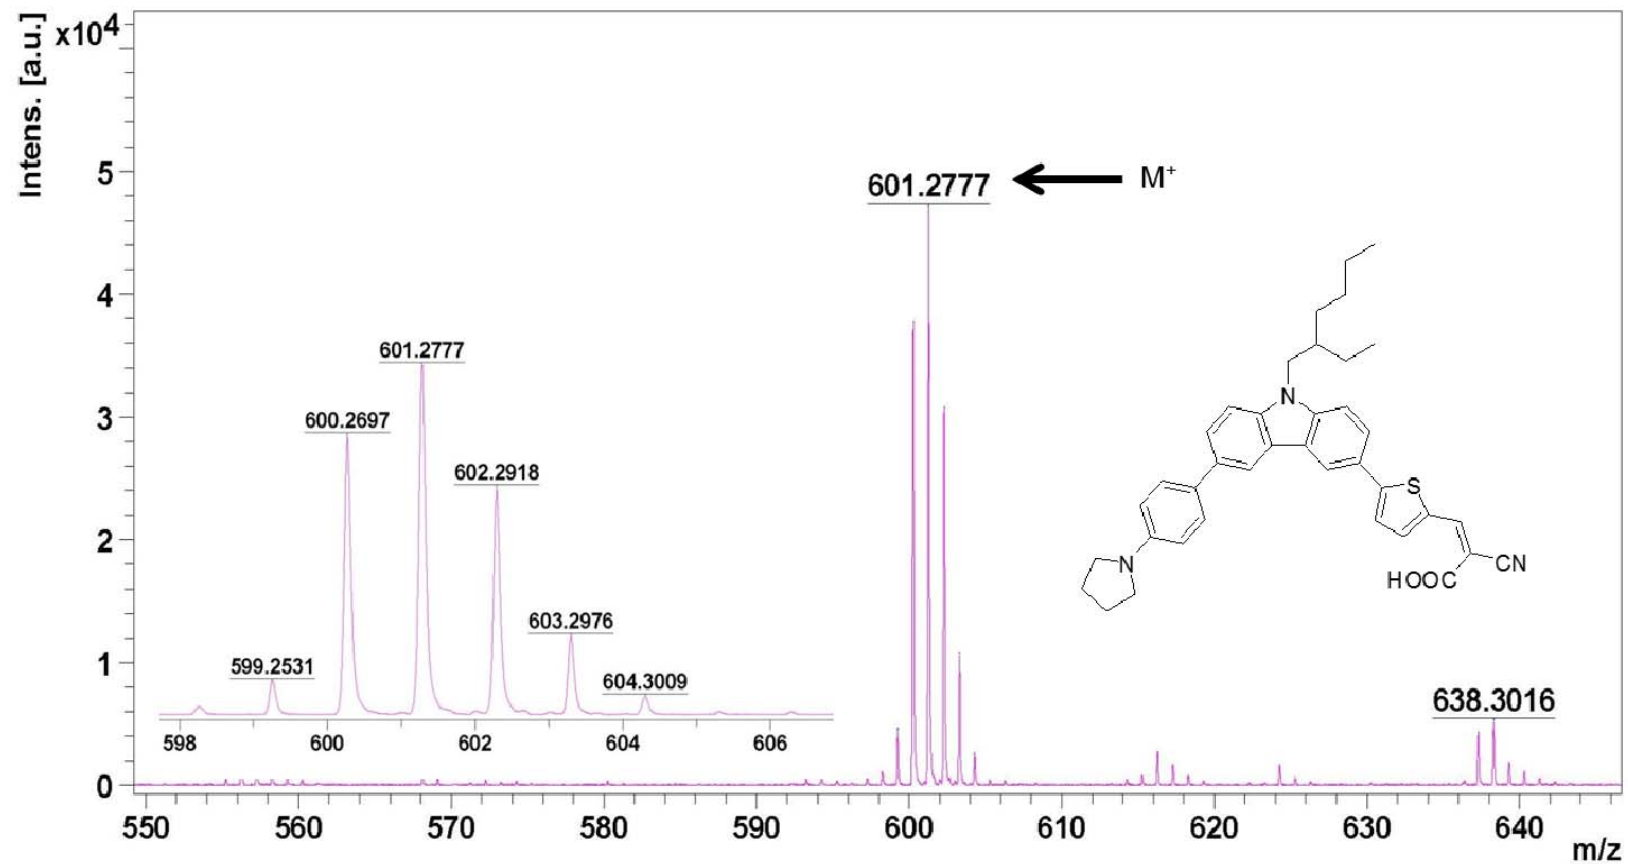



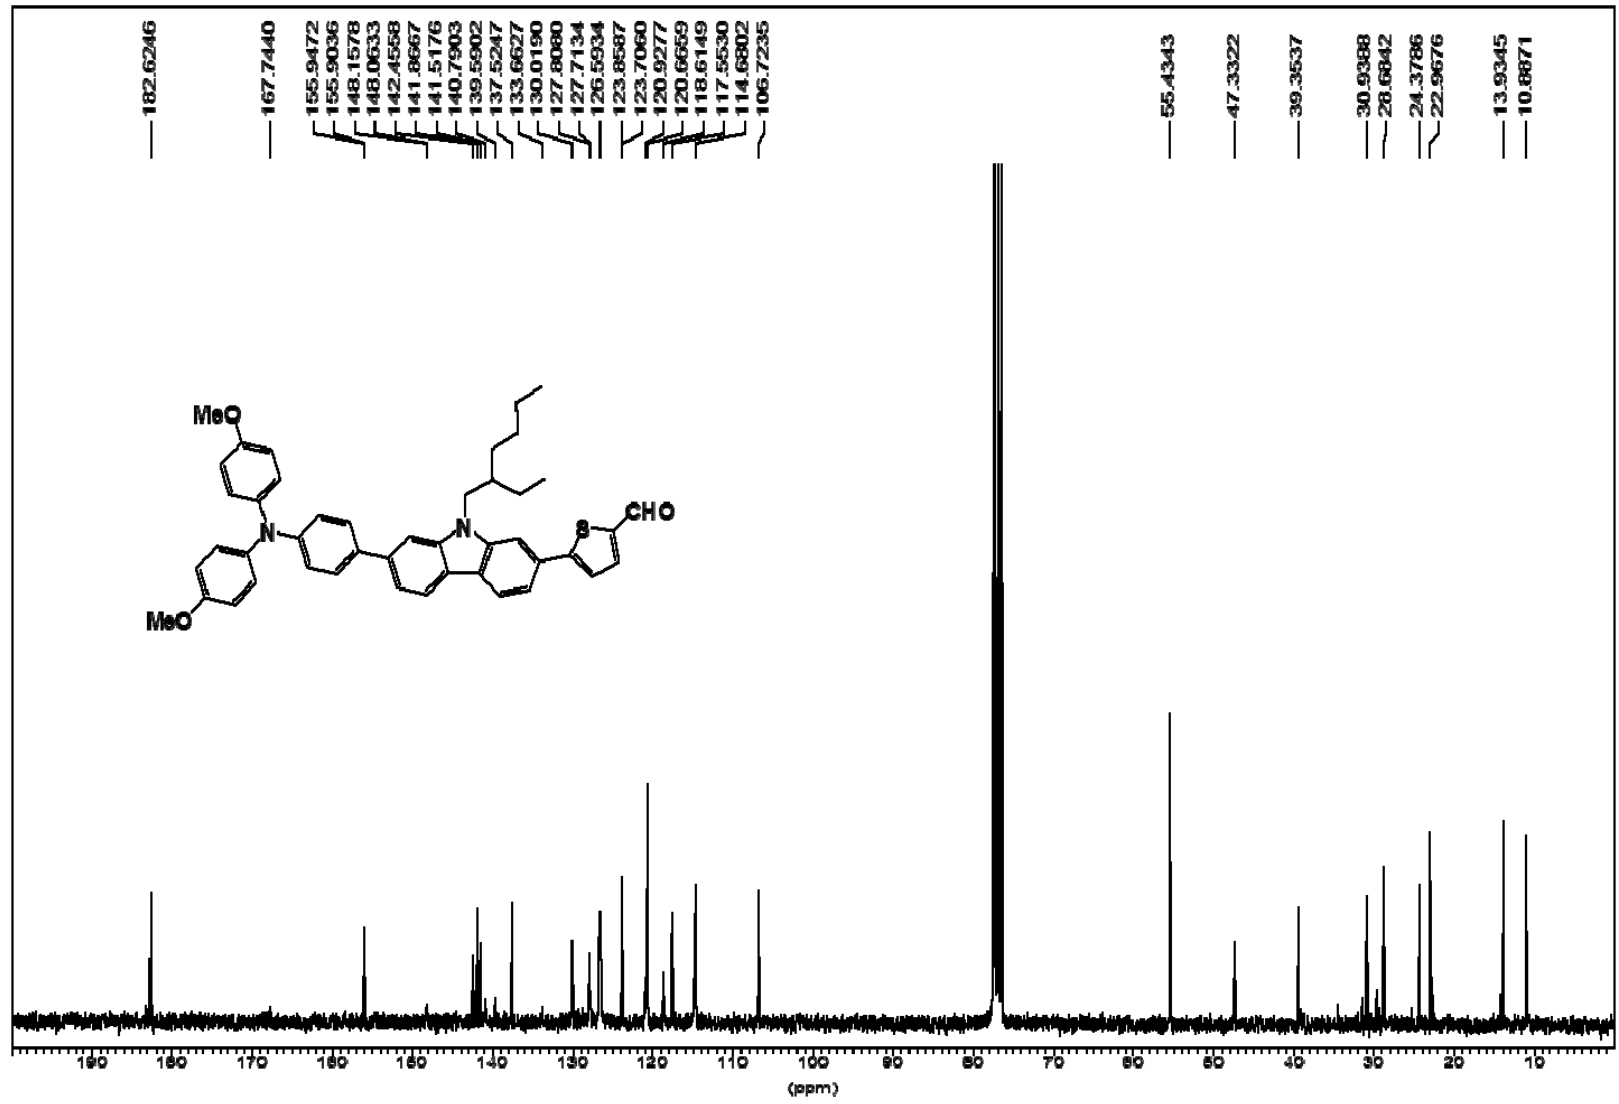

# Mass spectra of compound 4

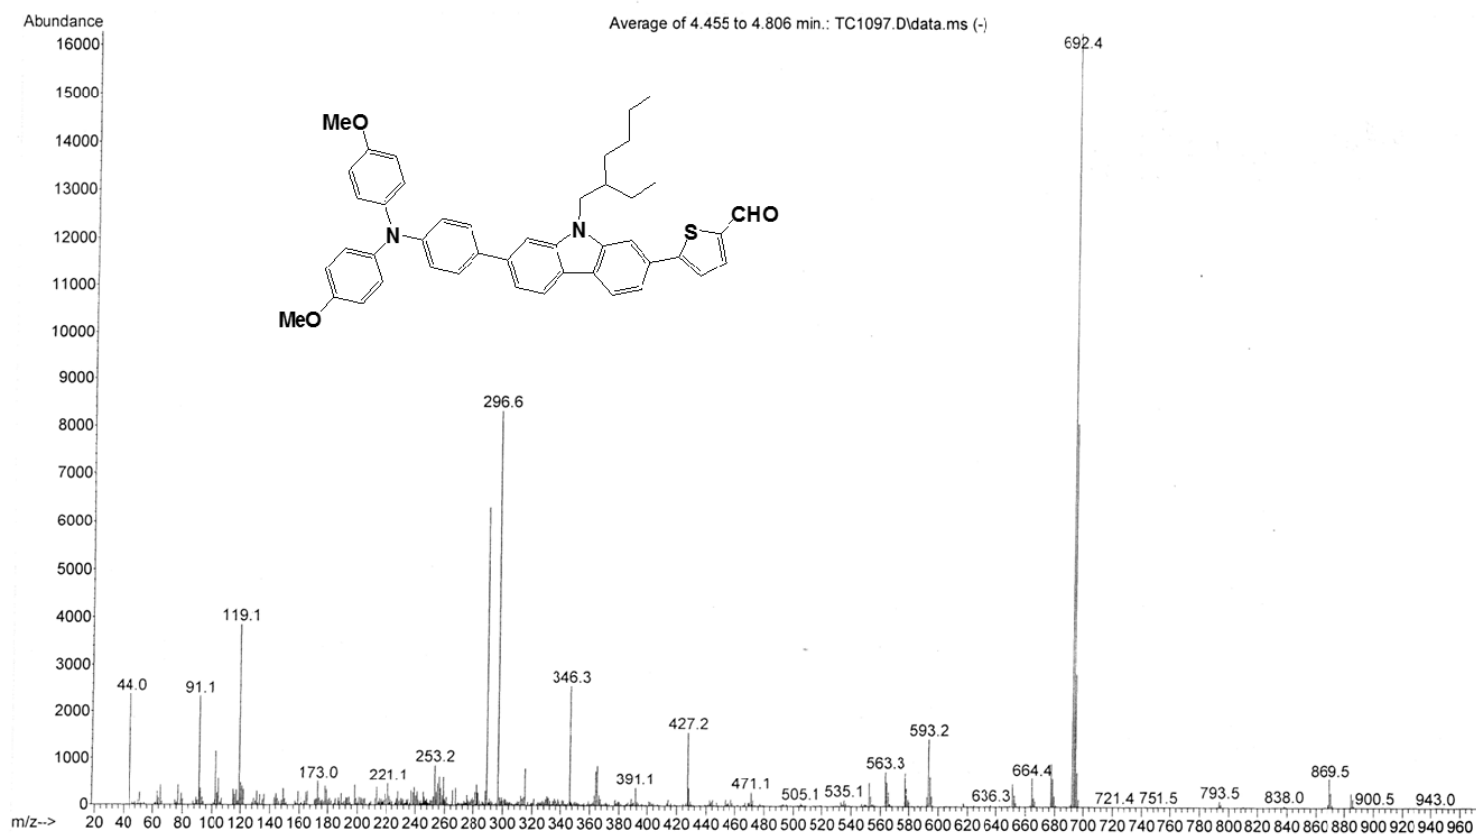

# 1H & 13C NMR of compound TC5

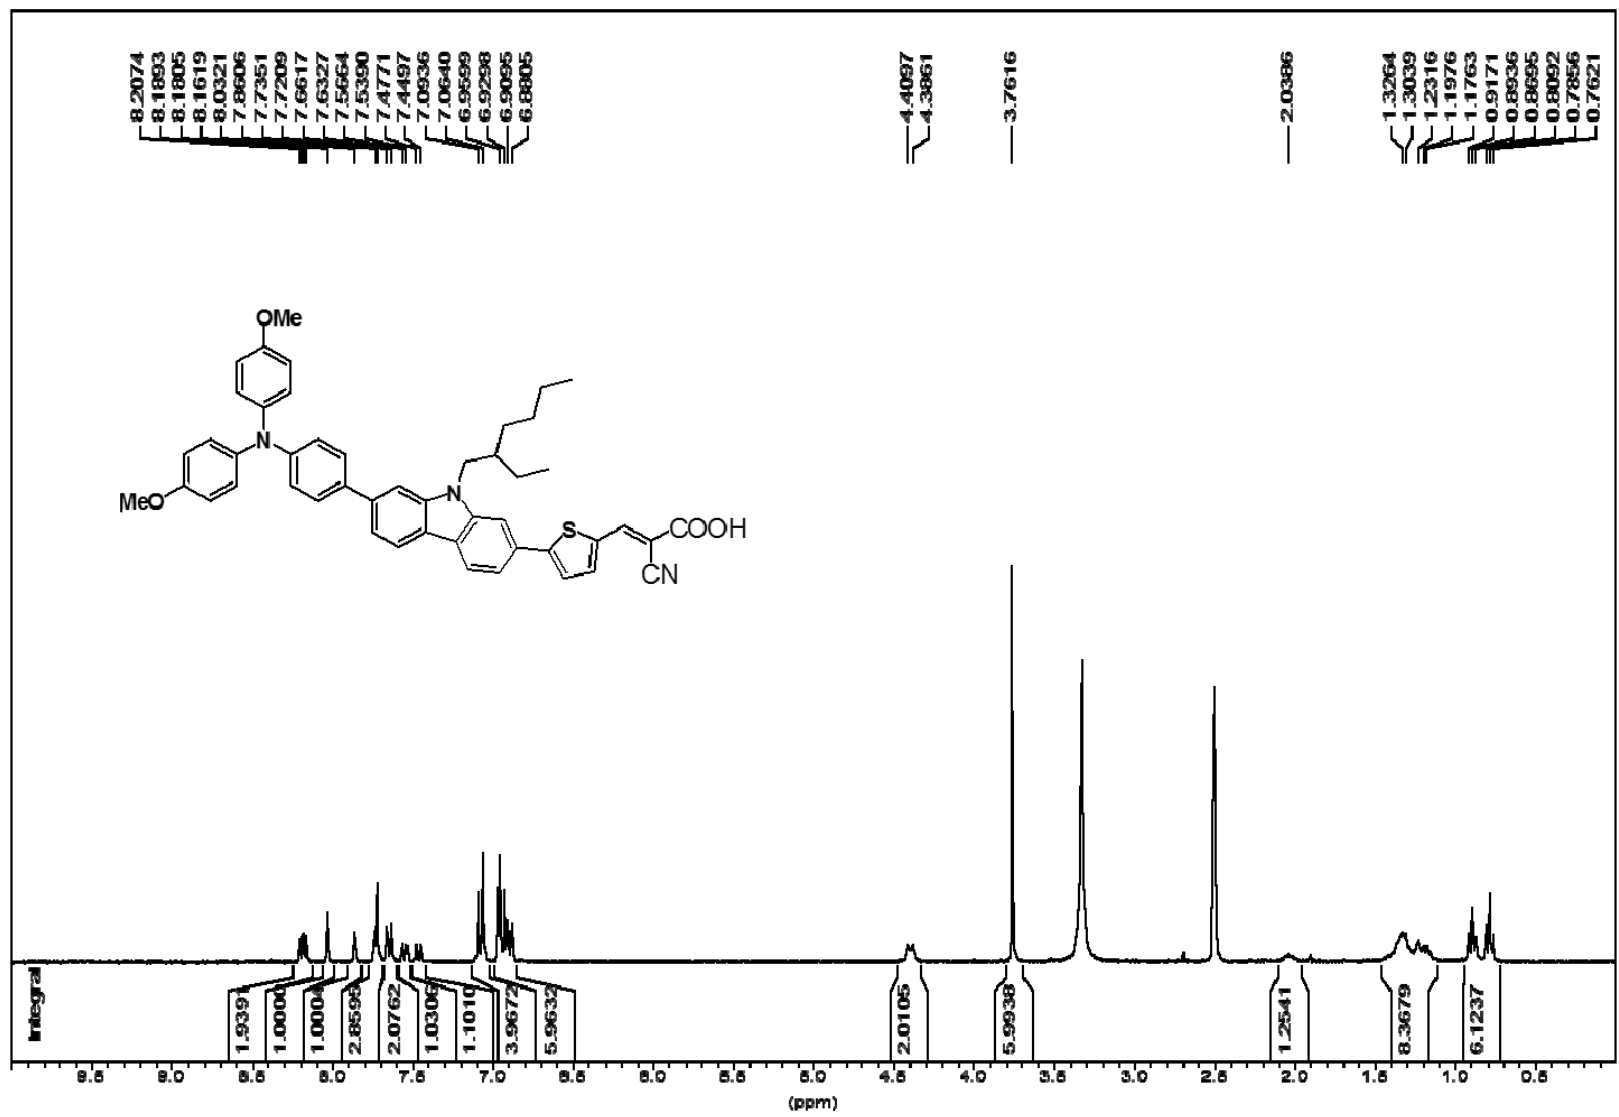



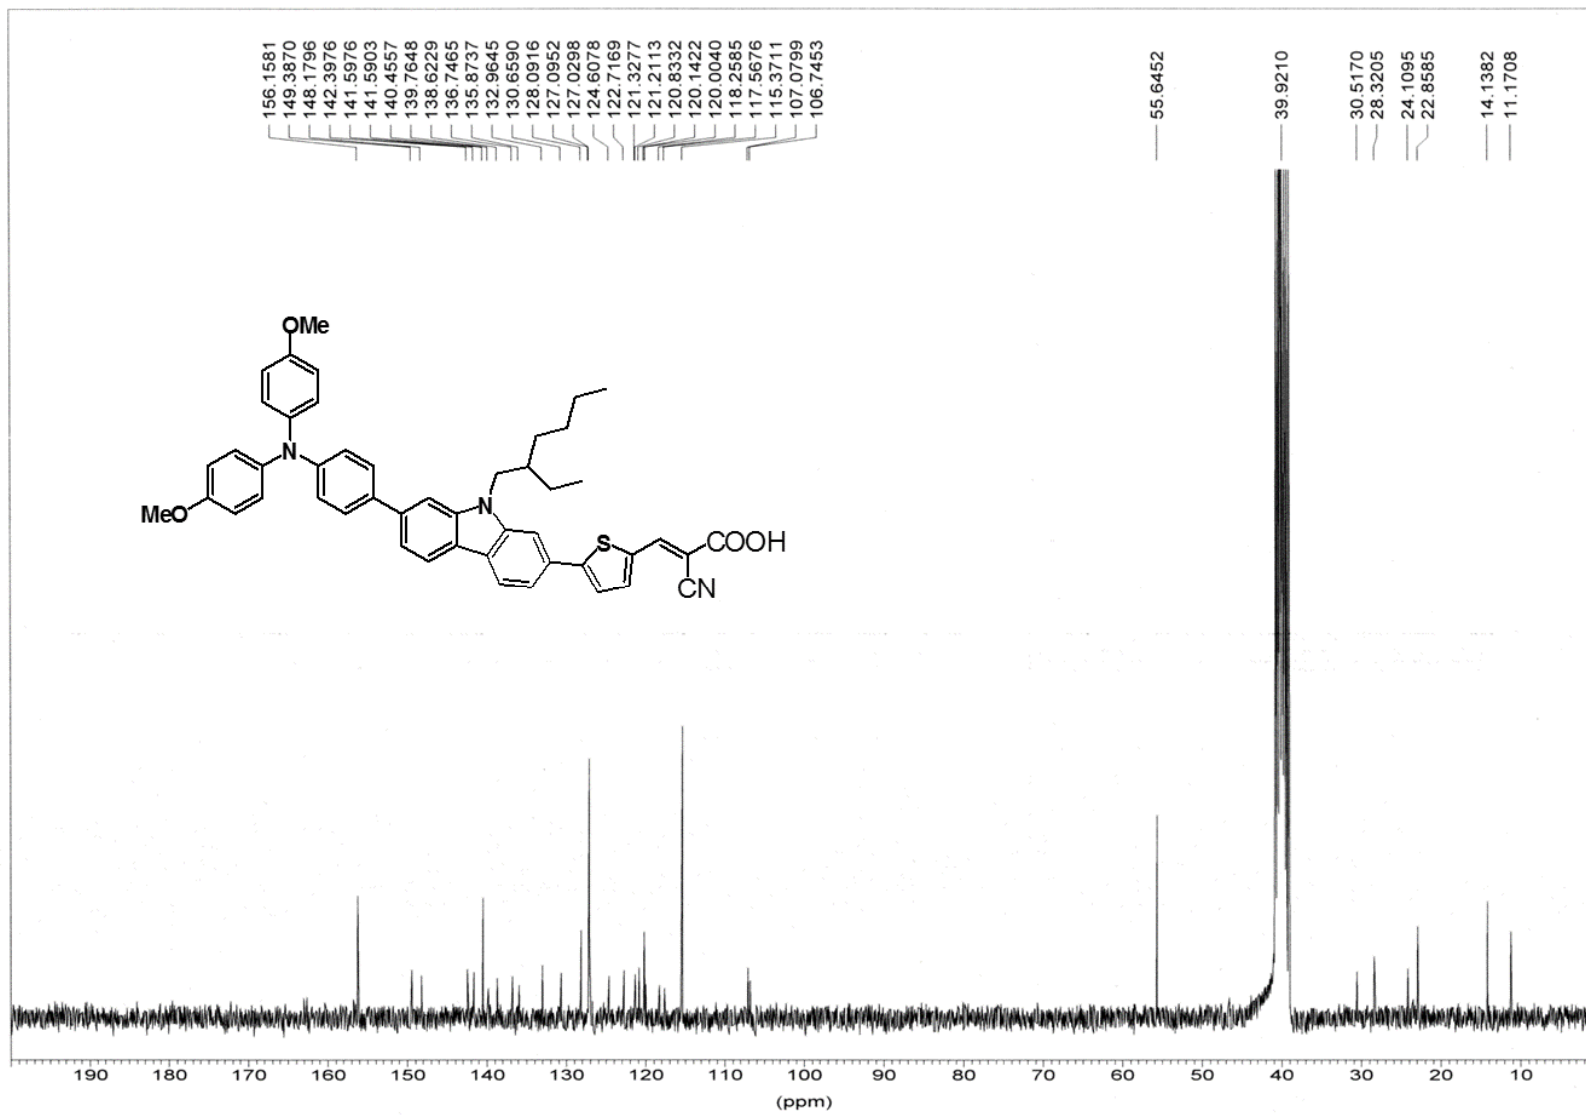

# FT-IR and MALDI-TOF of compound TC5

D:\Data\Users\keerthi\2012\130312\tc-3\_rp\0\_N23\1\1SRef

Comment 1

Comment 2

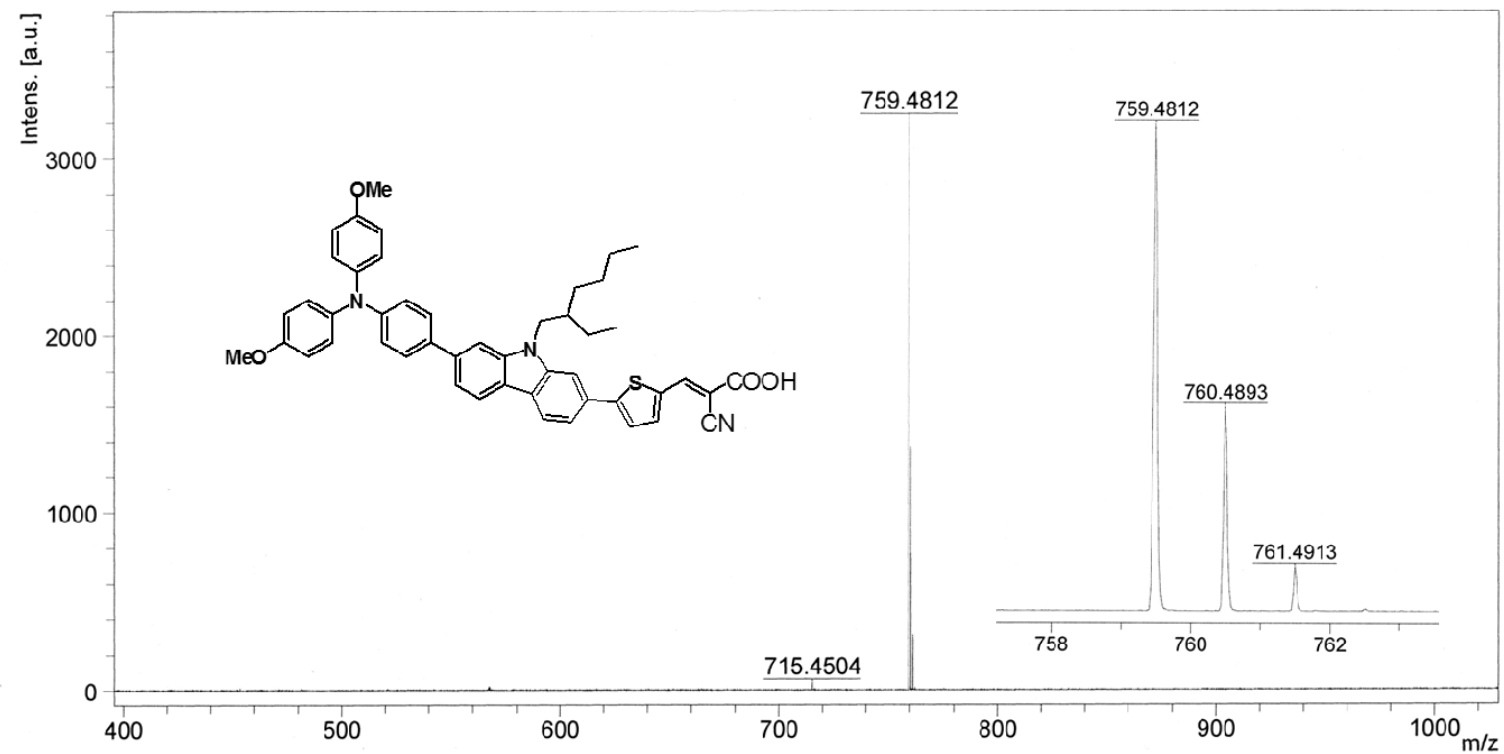

Bruker Daltonics flexAnalysis

printed: 3/13/2012 11:15:09 AM

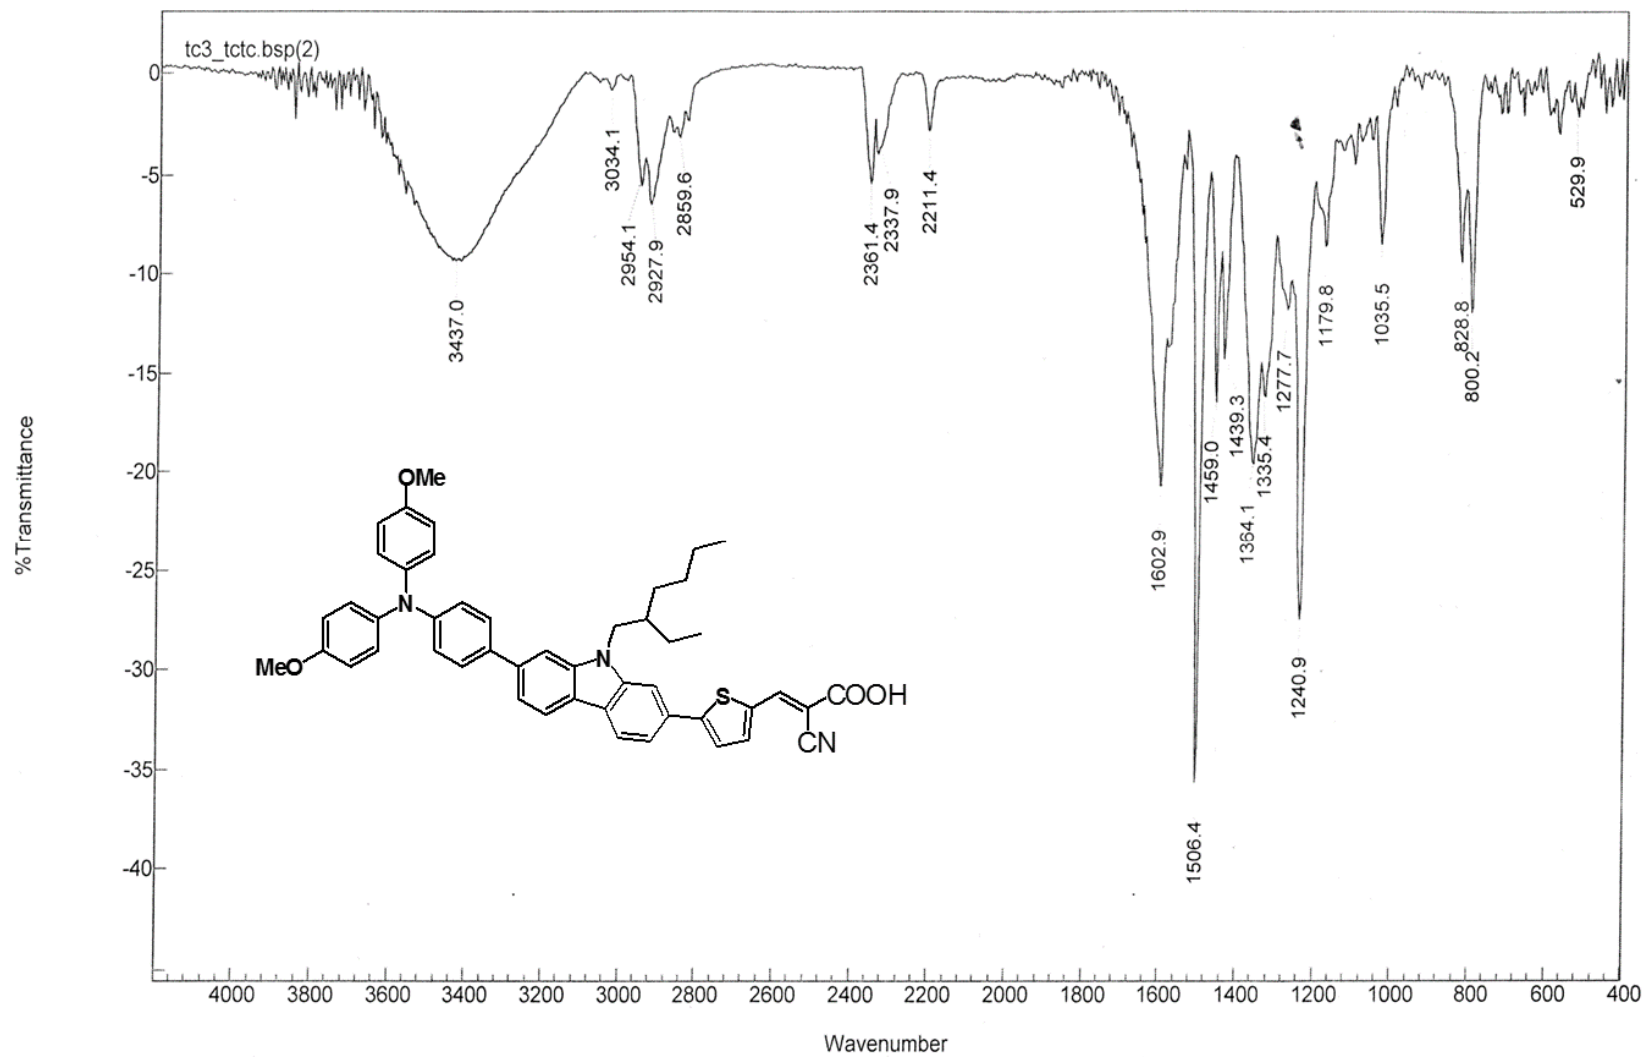

Supplement: c6ra08530j1.pdf [file c6ra08530j1.pdf]
